# Supplementary material for: Ascertainment of Minimal Clinically Important Differences in the Diabetes Distress Scale–17: A Secondary Analysis of a Randomized Clinical Trial
Source: PubMed Central journal article supplement (PMC10652154; doi:10.1001/jamanetworkopen.2023.42950), 2023-11-15
Supplement: jamanetwopen-e2342950-s001.pdf [file jamanetwopen-e2342950-s001.pdf]

1  
2  
3  
4  
5  
6  
7  
8  
9  
10  
11  
12  
13  
14  
15  
16  
17  
18

**IIR 12-426: Point- of- care Health Literacy and Activation information  
to improve diabetes care (Phase 2)**

**VA HSR&D 12-426**

Principal Investigator/Study Chair: **Aanand Naik, MD**

Version Date: July 16, 2019

19 **0.0 Abstract**

20 **[Note: The current Central IRB application refers to Phase 2. Grey shaded elements refer**  
21 **to Phase 1 which was approved by the Institutional Review Board for Baylor College of**  
22 **Medicine and Affiliated Hospitals (IRB of record for the Michael E. DeBakey VA Medical**  
23 **Center, Houston, TX) and the Houston VA Research & Development Committee. See**  
24 **Protocol Number H-33772 approval letter (Attachment 1)]**

25 **0.0.1. Background:** Diabetes mellitus is a highly prevalent chronic condition, affecting one in  
26 five Veterans who use the Veterans Affairs (VA) health care system. Self-management skills  
27 are critical for controlling diabetes and reducing its cardiovascular sequela. Providing diabetic  
28 patients with effective self-management training and support can be challenging due to time  
29 constraints at primary care encounters and limited clinician training with behavior change. We  
30 have previously demonstrated that a group-based, VA primary care intervention to help patients  
31 set highly effective, evidence-based diabetes goals had a positive impact on both diabetes self-  
32 efficacy and hemoglobin (Hb) A1c levels. This study aims to evaluate the process of  
33 implementing a collaborative goal-setting intervention personalized to patient activation and  
34 health literacy levels (i.e. Empowering Patients in Chronic Care [EPIC]) into routine PACT care  
35 and to evaluate the effectiveness this intervention relative to usual care.

36 **0.0.2. Objectives:** Specific Aim 1: Assess effective processes for and costs associated with  
37 implementing a collaborative diabetes goal-setting intervention personalized to patient activation  
38 and FHL (i.e., EPIC) into the routine workflows of PACTs. H1: Formative measures within the  
39 PARIHS framework (evidence, context, facilitation) will be associated with implementation of  
40 EPIC (defined by reach, adoption, cost effectiveness, and fidelity measures) into routine PACT  
41 care. Specific Aim 2: Evaluate the effectiveness of delivering collaborative goal-setting  
42 personalized to patient activation and FHL on clinical (HbA1c) and patient-centered (Diabetes  
43 Distress Scale) outcomes among enrolled eligible patients. H2: Patients receiving collaborative  
44 goal-setting personalized to activation and FHL levels will have significant improvements in a)  
45 HbA1c and b) Diabetes Distress Scale levels, respectively, post-intervention (4-months)  
46 compared with patients receiving enhanced usual care. H3: Patients receiving collaborative  
47 goal-setting personalized to activation and FHL levels will maintain significant improvements  
48 after a maintenance period in a) HbA1c and b) Diabetes Distress Scale levels at 10 month  
49 follow-up, respectively, compared with patients receiving enhanced usual care.

50 **0.0.3. Methods:** In Phase 1 of the study, we will conduct a formative evaluation that includes  
51 33-48 key informant interviews with VISN 12 and Houston-based leadership, clinicians, and  
52 staff. This evaluation will identify how group and one-on-one sessions of EPIC can best be  
53 implemented into routine workflows of PACT. In Phase 2, we will conduct a randomized clinical  
54 trial enrolling Veterans with poorly controlled diabetes defined by average hemoglobin A1c of  $\geq$   
55 8% to receive EPIC or enhanced usual care. To meet a minimum target of 284 Veterans to be  
56 randomized for analysis, an estimated population of 428 Veterans will be enrolled, including  
57 screen failures, from across participating facilities (approximately 160 from Hines, 200 from  
58 Jesse Brown, and 68 between Houston and Lovell). Randomized subjects will be allocated  
59 evenly between EPIC and enhanced usual care (EUC). EPIC consists of six 1-hour

60 group sessions focusing on 1) Your Health, Your Values, 2) Diabetes ABCs, 3) Setting Goals and  
61 Making Action Plans, 4) Communication with Your Health Care Provider, 5) Staying Committed  
62 to Your Goals, and 6) Reviewing and Planning for the Future. After each group session, a one-  
63 on-one session between a designated PACT member and patient participants will focus on  
64 collaborative goal-setting. Designated PACT members will be trained to personalize goal-  
65 setting using patient-reported activation and health literacy data. We will collect laboratory and  
66 survey data at baseline, post-intervention, and post-maintenance phase. We will evaluate the  
67 effectiveness of personalized goal-setting compared to enhanced usual care on clinical (e.g.,  
68 hemoglobin A1c) and patient-centered (e.g., Diabetes Distress Scale) outcomes.

69

70

71

## 72 List of Abbreviations

|            |                                                                                               |
|------------|-----------------------------------------------------------------------------------------------|
| AHRQ       | Agency for Healthcare Research and Quality                                                    |
| ANCOVA     | Analysis of Covariance                                                                        |
| Ask Me 3   | Patient education program designed to improve communication between patients and health care  |
| Atlas-ti   | Qualitative data analysis software                                                            |
| BCM        | Baylor College of Medicine                                                                    |
| CBOC       | Community- Based Outpatient Clinic                                                            |
| CBT        | Cognitive Behavioral Therapy                                                                  |
| CERT       | Center for Education and Research on Therapeutics                                             |
| CREATE     | Collaborative Research and Enhance and Advance Transformation an Excellence Initiative        |
| CSQ-8      | Client Satisfaction Questionnaire                                                             |
| DDS        | Diabetes Distress Scale                                                                       |
| CDW        | Corporate Data Warehouse                                                                      |
| Delphi     | Structured communication technique created by RAND                                            |
| Deyo       | Comparative studies of comorbidity and multimorbidity measures                                |
| DSME       | Diabetes Self-Management Education                                                            |
| DSM-IV     | Diagnostic and Statistical Manual of Mental Disorders                                         |
| EPIC       | Empowering Patients in Chronic Care                                                           |
| EQ-5D      | Standardized instrument for use as a measure of health outcome                                |
| EUC        | Enhanced Usual Care                                                                           |
| FHCC       | Federal Health Care Center                                                                    |
| FHL        | Functional Health Literacy                                                                    |
| GET-D      | Goal-Setting Evaluation Tool for Diabetes                                                     |
| HbA1c      | Glycated hemoglobin                                                                           |
| HPDP       | Health Promotion and Disease Prevention                                                       |
| HSR&D      | Health Services Research and Development                                                      |
| ICC        | Intra-class correlation                                                                       |
| ICD-9-CM   | International Statistical Classification of Disease and Related Health Problems, 9th Revision |
| ICER       | Incremental cost-effectiveness ratio                                                          |
| IIR        | Investigator Initiated Research                                                               |
| IRB        | Institutional Review Board                                                                    |
| ISO        | Information Security Officer                                                                  |
| IQuEST     | Center for Innovations in Quality, Effectiveness and Safety                                   |
| JBVAMC     | Jesse Brown VA Medical Center                                                                 |
| MEDVAMC    | Michael E DeBakey VA Medical Center                                                           |
| MINANALYZE | Analyze imputations and generates valid statistical inferences                                |

|            |                                                                            |
|------------|----------------------------------------------------------------------------|
| MINI       | Short structured interview used to identify mental health conditions       |
| MIRECC     | Mental Illness Research, an Clinical Center                                |
| MPlus      | Statistical Software                                                       |
| ORCA       | Organizational Readiness to Change Assessment                              |
| P.A.R.T.   | Prepared, Ask, Repeat, Take Action                                         |
| PACTs      | Patient-Aligned Care Teams                                                 |
| PAM        | Patient Activation Measure                                                 |
| PARIHS     | Promoting Action on Research in Health Services                            |
| PCP        | Primary Care Provider                                                      |
| PEPPI      | Perceived Efficacy in Patient-Physician Interactions Questionnaire         |
| PHI        | Protected Health Information                                               |
| PI         | Principal Investigator                                                     |
| PII        | Personally Identifiable Information                                        |
| Proc MI    | Performs multiple imputation of missing data                               |
| Proc Mixed | Enables use of fitted models to make statistical inferences about the data |
| QUERI      | Veteran Affairs Diabetes- Quality and Enhancement Research Initiative      |
| RAND       | Research and Development                                                   |
| RCS        | Records Control Schedule                                                   |
| RCT        | Randomized Control Trial                                                   |
| RE-AIM     | Dimensions of Reach, Efficacy, Adoption, Implementation, and Maintenance   |
| REALM      | Rapid Estimate of Adult Literacy in Medicine                               |
| SAS        | Statistical Analysis Systems                                               |
| SKILLD     | Spoken Knowledge In Low Literacy in Diabetes Scale                         |
| S-TOFLA    | Test of Functional Health Literacy in Adults                               |
| SQL        | Structured Query Language                                                  |
| UNIX       | Multi-user computer operating system                                       |
| VA         | Veterans Affairs                                                           |
| VAMC       | Veteran Affairs Medical Center                                             |
| VINCI      | VA Informatics and Computing Infrastructure                                |
| VISN       | Veterans Integrated Service Network                                        |

73

74

75

76

|    |                                        |     |
|----|----------------------------------------|-----|
| 77 | <b>Contents</b>                        |     |
| 78 | Protocol Title: .....                  | 7   |
| 79 | 1.0 Study Personnel .....              | 7   |
| 80 | 2.0 Introduction.....                  | 8   |
| 81 | 3.0 Objectives.....                    | 123 |
| 82 | 4.0 Resources and Personnel .....      | 14  |
| 83 | 5.0 Study Procedures .....             | 19  |
| 84 | 5.1 Study Design.....                  | 19  |
| 85 | 5.2 Recruitment Methods .....          | 37  |
| 86 | 5.3 Informed Consent Procedures .....  | 39  |
| 87 | 5.4 Inclusion/Exclusion Criteria ..... | 40  |
| 88 | 5.5 Study Evaluations .....            | 41  |
| 89 | 5.6 Data Analysis .....                | 43  |
| 90 | 5.7 Withdrawal of Subjects.....        | 48  |
| 91 | 6.0 Reporting.....                     | 46  |
| 92 | 7.0 Privacy and Confidentiality .....  | 50  |
| 93 | 8.0 Communication Plan .....           | 52  |
| 94 | 9.0 References .....                   | 55  |
| 95 |                                        |     |
| 96 |                                        |     |

97 **Protocol Title:** Point-of-care Health Literacy and Activation Information to improve Diabetes Care  
98 (Phase 2)

## 99 **1.0 Study Personnel**

100 Principal Investigator/Study Chair:

101 **LeChauncy Woodard, MD, MPH**  
102 MEDVAMC, 580  
103 (713) 440-4441 (office)  
104 (713) 748- 7359 (fax)  
105 [Woodard.lechauncy@va.gov](mailto:Woodard.lechauncy@va.gov)  
106

107 Co-Investigators:

108 **Aanand Naik, MD, MS**  
109 MEDVAMC, 580  
110 (713) 794-8541 (office)  
111 (713) 748- 7359 (fax)  
112 [Aanand.naik@va.gov](mailto:Aanand.naik@va.gov)  
113

114 **Amber Ampoker, PhD**  
115 Biostatistician  
116 MEDVAMC, 580  
117 (713) 440-4446 (office)  
118 (713) 748- 7359 (fax)  
119 [Amber.ampoker@va.gov](mailto:Amber.ampoker@va.gov)  
120

121 **Howard Gordon, MD**  
122 Physician  
123 JBVAMC  
124 (312) 569-7473 (office)  
125 [Howard.gordon@va.gov](mailto:Howard.gordon@va.gov)  
126

127 **Brian Hertz, MD**  
128 Physician  
129 Edward Hines Jr. VA Hospital  
130 (708) 492-3915 (office)  
131 [Brian.hertz@va.gov](mailto:Brian.hertz@va.gov)  
132

133 **Commander David Damstra, MD**  
134 Physician  
135 James A. Lovell Federal Health Care Center  
136 (847) 688-1900 x 87761  
137 [David.Damstra@va.gov](mailto:David.Damstra@va.gov)  
138

139 **Jennifer Arney, PhD**  
140 Qualitative Methodologist  
141 University of Houston Clear Lake  
142 (713) 440-4496 ext: 10374  
143 [Jennifer.arney@va.gov](mailto:Jennifer.arney@va.gov)  
144

145  
146  
147  
148  
149  
150  
151  
152  
153  
154  
155  
156  
157  
158  
159  
  
160  
  
161  
  
162  
  
163  
  
164  
  
165  
  
166  
  
167  
  
168  
  
169  
  
170  
  
171  
  
172  
  
173

**Natalie Hundt, PhD**  
Research Psychologist  
MEDVAMC, 580  
(713) 440-4450 (office)  
(713) 748- 7359 (fax)  
[Natalie.hundt@va.gov](mailto:Natalie.hundt@va.gov)

## 2.0 Introduction

Diabetes mellitus affects one in five Veterans who use the Veterans Affairs (VA) healthcare system.<sup>1</sup> Serious cardiovascular diseases, like stroke and myocardial infarction, arise in many diabetic



177 patients and account for most of the mortality attributed to diabetes.<sup>2</sup> Self-management skills are  
178 critical for controlling diabetes and reducing its cardiovascular sequela.<sup>3,4</sup> Providing diabetic patients  
179 with effective self-management training and support can be challenging due to time constraints at  
180 primary care encounters and limited clinician training with behavior change.<sup>5</sup> We have previously  
181 demonstrated that a group-based, VA primary care intervention to help patients set highly effective,  
182 evidence-based diabetes goals had a positive impact on both diabetes self-efficacy and hemoglobin  
183 (Hb) A1c levels.<sup>6</sup> This study applied collaborative goal-setting theory.<sup>7-9</sup> to empower patients to make  
184 diabetes self-management goals and to facilitate goal attainment at subsequent group visits.<sup>6,10</sup> Unlike  
185 most educational programs that demonstrate regression to the mean at 4-months, participants in the  
186 goal-setting treatment arm sustained HbA1c improvements for nine months after the active  
187 intervention.<sup>11</sup> However, ongoing improvements in goal-setting quality were not seen when participants  
188 returned to routine primary care and the maintenance of goal-setting activities remained modest at 1-  
189 year among intervention participants, suggesting the need to further refine the collaborative goal-  
190 setting program.

191 The effectiveness and maintenance of goal-setting interventions may be enhanced by  
192 incorporating VA staff into the collaborative goal-setting process. With appropriate training, existing VA  
193 personnel can enhance diabetes outcomes by integrating personalized information about patients'  
194 reported self-care capacity (i.e., functional health literacy [FHL]) and motivation (i.e., patient activation  
195 measure) into the collaborative goal-setting process.<sup>12,13</sup> In an HSR&D-funded pilot study, we  
196 demonstrated that brief measures of FHL and patient activation synergistically predicted HbA1c  
197 levels.<sup>14</sup> Thus, assessing patients' FHL and level of activation within the VA PACT context may allow  
198 PACTs to better personalize goal-setting among Veterans with diabetes. While validated, practical  
199 measures of FHL and activation levels exist; they have not been effectively integrated into routine  
200 PACT practice and shown to impact patient outcomes. If such measures were integrated at the point  
201 of care (i.e., when primary care providers and patients are developing collaborative diabetes goals),  
202 PACT clinicians could personalize goals and action plans within patients' particular limitations and  
203 preferences for involvement.

## 204 **2.A. Background and Conceptual Model**

205 **2.A.i. Self-management training and support are key to improving the health outcomes of**  
206 **Veterans with treated but uncontrolled diabetes.** At any given time, over one million Veterans are  
207 receiving health care services for diabetes, and many suffer adverse vascular outcomes, such as  
208 myocardial infarction, blindness and peripheral artery disease.<sup>1</sup> Diabetes control, characterized by  
209 reductions in hemoglobin (Hb)A1c, blood pressure, and cholesterol levels, is directly associated with  
210 lower morbidity and mortality.<sup>15</sup> Because diabetes is a self-managed condition, achieving diabetes  
211 control requires patient involvement in most aspects of treatment planning and management.<sup>16</sup> As a  
212 result, self-management training and support is a cornerstone of evidence-based treatment for diabetes  
213 in primary care; this practice is endorsed by national standards from the American Diabetes  
214 Association,<sup>17</sup> the VA-Department of Defense Management of Diabetes Mellitus Clinical Practice  
215 Guidelines,<sup>18</sup> and the VA Diabetes-Quality Enhancement Research Initiative (QUERI).<sup>19</sup>

216 **2.A.ii. Delivering self-management training and support in routine primary care can be difficult,**  
217 **and traditional education programs are handicapped by outdated methods.** Most prior self-  
218 management interventions have focused on didactic education rather than personalized treatment-  
219 planning and development of problem-solving skills.<sup>20</sup> The traditional primary care visit is not an ideal  
220 setting to develop or support self-management skills due to time constraints and the need for team-  
221 based approaches.<sup>21</sup> The move towards patient-centered medical homes (referred to as Patient-  
222 Aligned Care Teams [PACT] within VA primary care)<sup>22</sup> provides an excellent opportunity to efficiently  
223 and effectively integrate diabetes self-management training and support into primary care.<sup>23</sup> The goal  
224 of VA PACTs is to provide integrated, comprehensive, Veteran-centered primary care tailored to  
225 individual characteristics, values, and goals.<sup>22</sup>

226 **2.A.iii. Empirically supported, theory-driven methods of diabetes self-management exist, but**  
 227 **more data are needed on wide-spread dissemination and integration into primary care.**  
 228 Collaborative Goal-Setting (Figure 1) is an empirically-supported theory for enhancing human effort,  
 229 motivation, and persistence toward an outcome. It encourages development of skills and problem-  
 230 solving strategies for overcoming obstacles when challenges arise.<sup>7;8;24</sup> When adapted to a chronic  
 231 illness context (main pathway in Figure 1), collaborative goal-setting between patients and clinicians  
 232 results in greater performance of self-management action plans and improved clinical and patient-  
 233 centered outcomes.<sup>9;11;25;26</sup> Recent clinical trials have firmly established the clinical effectiveness of  
 234 diabetes self-management training and support based on goal-setting theory.<sup>6;27-29</sup> However, there is  
 235 considerable variability across studies, and an Implementation Science approach is needed to resolve  
 236 gaps in our understanding of how large-scale goal-setting interventions can be effectively implemented  
 237 into routine workflows and processes of busy health care providers.<sup>11</sup>

238 One of these critical gaps is how best to integrate self-management training and support into  
 239 the routine structure of VA PACTs. We have developed and tested a collaborative goal-setting  
 240 intervention in a trial of two diabetes group clinic interventions: 1) standard diabetes and nutrition  
 241 education and 2) our collaborative goal-setting approach.<sup>6</sup> The goal-setting approach focused on  
 242 setting high quality self-management goals and action plans linked to diabetes clinical outcomes  
 243 (Figure 1). Participants were also taught communication skills to elicit feedback and support about  
 244 their action plans. The methods used in this study evolved from prior work developing our model of  
 245 patient empowerment and goal-setting.<sup>30-33</sup> The intervention provided patients with training (group  
 246 sessions) and support (one-on-one sessions) with diabetes goal-setting. Participants randomized to  
 247 collaborative goal-setting had clinically significant improvements in HbA1c levels post-intervention and  
 248 at 1-year follow-up compared to those randomized to the education group. These outcomes were  
 249 mediated by improvements in self-efficacy related to diabetes self-management tasks.<sup>6</sup>

250

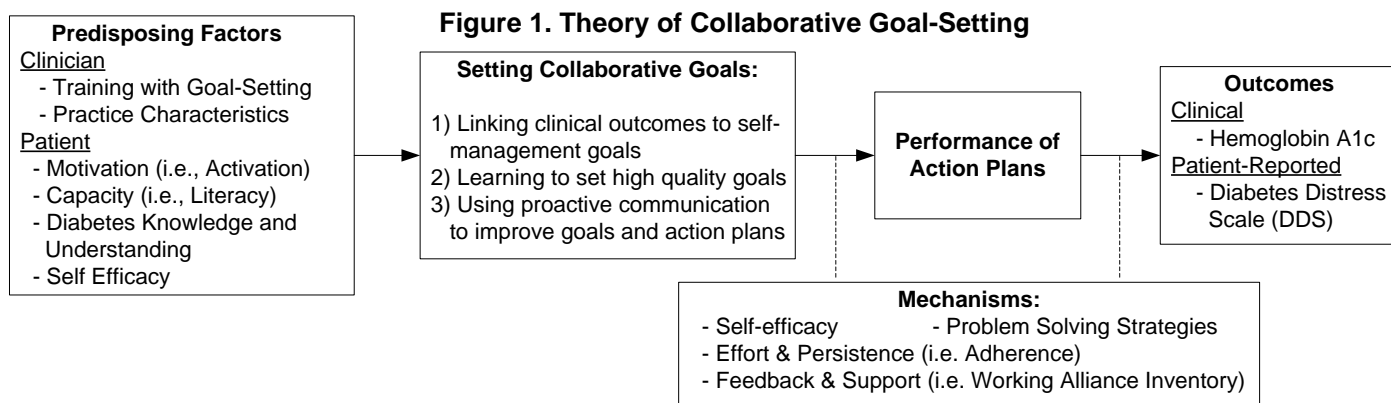

251  
252

253 **2.A.iii.a Despite these important successes, our prior collaborative goal-setting intervention**  
 254 **had limitations.** First, ongoing improvements in diabetes self-efficacy and outcomes were not seen  
 255 when participants returned to routine primary care after the intervention. Second, the maintenance of  
 256 goal-setting behaviors remained modest at 1-year among participants. These limitations may reflect  
 257 the fact that we relied on trained research staff to conduct the full intervention and patients' primary  
 258 care providers had little involvement in the goal-setting process. In addition, the prior study occurred  
 259 prior to the widespread rollout of PACTs across VA. The proposed study addresses these limitations  
 260 by implementing the intervention into routine PACT care and using a PACT members to set  
 261 personalized goals.

262 **2.A.iv. VA PACT realignment creates an opportune setting for involving primary care providers**  
263 **in collaborative goal-setting.** The core team or “teamlets” within PACT consist of the Veteran patient,  
264 a primary care provider, a nurse care manager, a clinical associate (e.g., licensed practical nurse or  
265 health technician) and a clerk.<sup>22</sup> Several teamlets work closely with a larger multidisciplinary team that  
266 includes pharmacists, social workers, nutritionists, specialist providers, and staff, including behavioral  
267 health specialists. These specialists assist patients with self-management goals and developing  
268 problem-solving action plans (i.e., health coaching). Goal-setting and action plans are key elements of  
269 effective diabetes self-management.<sup>20;31;34;35</sup> Indeed, the objectives of diabetes goal-setting are  
270 completely consistent with the patient-centered mission of PACT. Given realignment of VA primary  
271 care towards PACT, dissemination of an evidence-based method for delivering collaborative goal-  
272 setting is the right intervention at the right time to improve patient-centered and clinical outcomes for  
273 diabetes care.

274 **2.A.v. Further enhancements of collaborative goal-setting can be achieved by integrating**  
275 **personalized information about patients’ activation and health literacy levels.** The success of  
276 goal-setting (see predisposing patient factors in Figure 1) is influenced by patient’s motivation  
277 (possessing the skills, beliefs, activation and confidence to manage one’s health), and capacity (the  
278 ability to process and understand basic health information and carry out health decisions). From a  
279 conceptual perspective, motivation and capacity can be measured using scales of patient activation  
280 and functional health literacy (FHL), respectively.<sup>12;13</sup>

281 Both FHL and activation play critical roles in achieving diabetes control. Patients with  
282 uncontrolled diabetes tend to be passive (low activation levels)<sup>36</sup> and have limited FHL.<sup>37</sup> Studies show  
283 that diabetic patients with inadequate FHL are less likely to achieve glycemic control<sup>37</sup> and experience  
284 greater difficulty with self-management tasks necessary for diabetes control.<sup>38</sup> Similarly, patients with  
285 lower levels of activation also have poorer diabetes self-management and medication adherence.<sup>12</sup> In a  
286 prior study, a literacy-focused diabetes intervention was effective in improving glycemic control and  
287 self-efficacy in patients with uncontrolled diabetes.<sup>39</sup> Another study found that tailoring self-  
288 management coaching to activation levels in diabetic patients was associated with improvements in  
289 activation, blood pressure, and low density lipoprotein control.<sup>12</sup>

290 In an HSR&D-funded pilot study (Woodard, PI), we demonstrated that brief measures of FHL  
291 and patient activation can be elicited among diabetic patients, and those with high scores on both  
292 measures had significantly lower HbA1c levels ( $p < .005$ ).<sup>14</sup> In another study, our team explored how  
293 FHL and activation impact preferences for collaborative decision making among chronically ill Veterans  
294 and demonstrated that these preferences are potentially mutable when clinicians consider FHL.<sup>40</sup>  
295 Given these findings, personalizing diabetes goal-setting using **both** activation and FHL is an important  
296 next step in improving collaborative goal-setting between patients and PACT members. We anticipate  
297 that addressing both activation and FHL will have a synergistic effect, leading to higher quality goals,  
298 action plans and ultimately, better diabetes outcomes.

299 **2.A.vi. Delivering FHL and activation information and training PACT members to personalize**  
300 **goal-setting using this information can improve diabetes outcomes.** Health care providers  
301 frequently have difficulty identifying patients with limited FHL;<sup>41;42</sup> therefore, delivering information about  
302 FHL to providers during patient-provider encounters may enhance communication and decision-  
303 making. However, work in this area is limited. In a study by Seligman et al.,<sup>43</sup> physicians who were  
304 notified of their diabetic patients' limited FHL prior to a visit reported greater use of strategies to  
305 improve communication about disease management, but were less satisfied with encounters due to  
306 feelings of inadequacy about using FHL information. Importantly, participating physicians received little  
307 education about how to use FHL information to guide interactions.<sup>43</sup> Our team has experience training  
308 research and PACT members in the process of collaborative goal-setting,<sup>11</sup> and we are currently  
309 testing a telephone delivered intervention with PACT members trained to use goal-setting in Veterans  
310 with diabetes and depression (Naik, IIR 10-135). We posit that personalized FHL and activation

311 information provided at the point of care (i.e., when PACT members evaluate the data and have goal-  
312 setting discussions) can improve the effectiveness of goal-setting if PACT members are appropriately  
313 trained on how to best integrate this personalized data into the collaborative goal-setting process.  
314 Further research is needed to explore the impact of personalized, collaborative goal-setting on clinical  
315 and patient-centered outcomes.

316

## 317 **2.B. Significance and Relevance to Veterans' Health and the VA PACT Initiative**

318 This study will provide patient-reported FHL and patient activation information to PACT  
319 members to improve collaborative goal-setting in patients with treated but uncontrolled diabetes and  
320 ultimately, improve clinical and patient-centered outcomes.

321 **2.B.i. We will use an innovative strategy that brings together three elements to improve the**  
322 **quality and responsiveness of VA PACT care to the needs of over 1,000,000 Veterans with**  
323 **diabetes.** First, the study seeks PACT clinical team members' input on barriers and facilitators to the  
324 delivery of patient-reported FHL and activation measures to PACTs and then evaluates processes for  
325 implementing an innovative diabetes goal-setting intervention personalized to patients' activation and  
326 FHL levels across PACTs. Second, the study trains PACT members to use FHL and activation  
327 information to better personalize collaborative goal-setting. Most importantly, the study evaluates the  
328 clinical effectiveness of this personalized, collaborative goal-setting intervention on clinical and patient-  
329 centered diabetes outcomes, relative to enhanced usual care (EUC).

330 **2.B.ii. Our protocol delivers FHL and activation measures at the point of care to personalize**  
331 **collaborative diabetes goal-setting-consistent with the PACT mission.** When delivered at the  
332 point of care,<sup>44</sup> measures of FHL and activation can influence how PACT members engage in  
333 collaborative goal-setting. Considering patient-reported levels of FHL and activation allows for a  
334 personalized process of goal-setting, resulting in:

- 335 • more specific, personalized feedback shaped by their awareness of patients' activation and  
336 FHL,
- 337 • higher quality self-management goals and action plans, which in turn promote greater self-  
338 efficacy, and
- 339 • ultimately, better diabetes clinical and patient-centered outcomes.

340

341 This study uses a hybrid type 1 design in which the primary focus is on testing the effectiveness  
342 of personalized goal-setting versus enhanced usual care on diabetes outcomes (aim 2), while also  
343 collecting some implementation data. Our objective is to test the personalized collaborative goal-setting  
344 intervention with a randomized controlled trial (Phase 2) within the constraints of PACT workflows using  
345 real-world PACT members instead of research staff. The implementation aim (Phase 1) includes a  
346 formative evaluation intended to facilitate integration of the personalized goal-setting intervention within  
347 routine PACT workflows and a summative evaluation that measures aspects of implementation. Work  
348 on Phase 1 is already underway and is approved under the auspices of the Baylor College of Medicine  
349 IRB, the local IRB of record for the Michael E. DeBakey VA Medical Center in Houston, TX.

350

351

## 352 **3.0 Objectives**

353 The overall goals of this hybrid type I effectiveness/implementation trial are to 1) evaluate the  
354 process of implementing a collaborative (i.e., patient and PACT member) goal-setting intervention

355 personalized to patient activation and FHL (i.e., Empowering Patients in Chronic Care [EPIC]) into  
356 routine PACT care; and 2) test the effectiveness of this intervention relative to enhanced usual care.  
357 In Phase 1(Aim 1), we used the Promoting Action on Research in Health Services (PARIHS)  
358 framework to evaluate the feasibility of potential implementation processes into routine PACT care . In  
359 Phase 2 (Aim 2), we will assess the effect of delivering personalized goal-setting on clinical (e.g.,  
360 HbA1c) and patient-centered (e.g., diabetes-related distress) outcomes among Veterans with  
361 uncontrolled diabetes. We anticipate that delivering personalized goal-setting involving patients and  
362 their PACTs will lead to improvements in diabetes care.

363

364 **3.B.** Specific Aim 1: Assessed effective processes for and costs associated with implementation of a  
365 collaborative diabetes goal-setting intervention personalized to patient activation and FHL (i.e., EPIC)  
366 into the routine workflows of PACTs.

367 H1: Formative measures within the PARIHS framework (evidence, context, facilitation) will be  
368 associated with implementation of EPIC (defined by reach, adoption, cost effectiveness, and  
369 fidelity measures) into routine PACT care.

370

371 **3.C.** Specific Aim 2: Evaluate the effectiveness of delivering collaborative goal-setting personalized to  
372 patient activation and FHL on clinical (HbA1c) and patient-centered (Diabetes Distress Scale)  
373 outcomes among eligible patients.

374 H2: Patients receiving collaborative goal-setting personalized to activation and FHL levels will have  
375 significant improvements in a) HbA1c and b) Diabetes Distress Scale levels, respectively, post-  
376 intervention compared with patients receiving enhanced usual care.

377

378 H3: Patients receiving collaborative goal-setting personalized to activation and FHL levels will  
379 maintain significant improvements in a) HbA1c and b) Diabetes Distress Scale levels at 1-year  
380 follow-up, respectively, compared with patients receiving enhanced usual care.

381

## 382 **4.0 Resources and Personnel**

### 383 **4.A. Location of Research, Phase 1 and Phase 2**

384 All data analysis for Phase 1 and Phase 2 will occur at the Houston VA IQuEST (see § D 5.6 Data  
385 analysis)

386

#### 387 **4.A.i. Study Team Roles, Phase 1 and Phase 2**

388

##### 389 **Houston, TX Personnel**

- 390 • LeChauncy Woodard, MD, MPH: (Principal Investigator). Dr. Woodard is a staff Physician at the  
391 Houston VA Medical Center and an Assistant Professor of Medicine at Baylor College of Medicine,  
392 Houston, TX. She is a core investigator at the Houston VA IQuEST. Dr. Woodard has particular  
393 expertise in the design of facility and clinician performance measures as well as methods for  
394 enhancing the precision and clinical relevance of performance measurement. This expertise has a  
395 strong practical as well as theoretical grounding with Dr. Woodard's twelve-year partnership with  
396 VISN 12. She has used those skills in a VA HSR&D pilot study to identify high-risk primary care  
397 patients with co-existing diabetes, hypertension, and ischemic heart disease as well as in her

398 ongoing quality measurement contract work with VISN 12. As PI of the study, Dr. Woodard will  
399 provide primary oversight on all aspects of the project. She will be responsible for the overall  
400 research design and implementation, overall project management, lead preparation of project  
401 deliverables, assist with the data analysis and interpretation of findings. She will monitor subject  
402 recruitment and retention, human subjects' protections and provide intervention and analysis  
403 oversight. Dr. Woodard will provide oversight for all aspects of training and supervision of research  
404 personnel, conduct project meetings, and be responsible for the scientific progress of the research  
405 including manuscripts and reporting of study results. She will have access to protected health  
406 information.

- 407 • Aanand Naik, MD, MS (Co- Investigator): Dr. Naik is a staff Physician specializing in Geriatrics at  
408 the Houston VA Medical Center and an Assistant Professor of Medicine at Baylor College of  
409 Medicine. He is a core investigator at the Houston VA IQuEST. Drs. Woodard and Naik have  
410 collaborated extensively over the past years evaluating quality of care in chronic diseases. Dr. Naik  
411 is currently conducting a hybrid effectiveness-implementation study of a diabetes and depression  
412 telehealth intervention also using goal-setting methodology funded by VA HSR&D (IIR 10-135). Dr.  
413 Naik also has expertise in applied qualitative research methods. As Co-PI of this study, Dr. Naik will  
414 ensure the scientific integrity and overall progress of the goal-setting intervention. Specifically, he  
415 will assist Dr. Woodard in all aspects of the study, including recruitment and retention of  
416 participants, human subject protections, and intervention and assessment related to diabetes  
417 constructs. He provided more direct oversight on the applied qualitative methods and  
418 implementation elements in Phase 1. He worked closely with Drs. Woodard, Arney and Amspoker  
419 on the data analysis and interpretation of findings for Phase 1. He will provide oversight on the  
420 analysis for the summative evaluation of implementation. He will also assist Drs. Woodard and  
421 Hundt with training the research staff to conduct the EPIC group sessions.  
422
- 423 • Amber Amspoker, PhD (Co-Investigator): Dr. Amspoker is a social psychologist and a member of  
424 the Methodology and Statistics Core at the Houston VA IQuEST. She has experience with and  
425 knowledge of VA databases and statistical methods. She is highly skilled in using SAS and  
426 specializes in database management and analyses. She will be responsible for data management,  
427 all analyses, and will materially contribute to manuscript, presentation, and deliverable preparation.  
428 She will be responsible for leading the analytical work evaluating the study intervention. She will  
429 also assist with the writing of final reports and manuscripts describing the methodological  
430 approaches used in this study.  
431
- 432 • Natalie Hundt, PhD (Co-Investigator): Dr. Hundt is a clinical psychologist with expertise in  
433 behavioral health interventions. She serves as a Co-investigator on a hybrid effectiveness-  
434 implementation study of a diabetes and depression telehealth intervention also using goal-setting  
435 methodology funded by VA HSR&D (IIR 10-135; PI: Naik). For that project, Dr. Hundt co-developed  
436 the patient education materials and the coach training program. She delivers the training, mentors  
437 coaches and provides fidelity ratings for the intervention sessions. On this project, Dr. Hundt will  
438 use her expertise in behavioral health change to develop the intervention materials, training, and  
439 fidelity programs.  
440
- 441 • Jennifer Arney, PhD (Qualitative Methodologist): Dr. Arney is an Assistant Professor of Sociology at  
442 the University of Houston Clear Lake and has an adjunct appointment with Baylor College of  
443 Medicine in the Health Services Research Section. Her primary expertise is in qualitative methods.  
444 She teaches qualitative research methods at University of Houston Clear Lake and a mini-course in  
445 qualitative research as part of the Education and Training Core's Foundations in HSR curriculum at  
446 the Houston VA IQuEST. She provided consultation on qualitative methods (study design,  
447

448 participant sampling, interview guide development, coding and thematic analysis, and reporting of  
449 study results) for Phase 1. She also conducted training of project staff to serve as interviewers and  
450 secondary coders on Phase 1 data analysis.  
451

452

453 • Lea Kiefer, MPH (Research Coordinator): Ms. Kiefer will be responsible for coordination among the  
454 research team, updating research findings, and assisting in the development of materials for  
455 presentations, manuscripts or publications. She has a long-standing relationship working with Dr.  
456 Woodard as a project manager. She will conduct weekly project meetings and serve as the point of  
457 contact for all project-related correspondence. In addition, with Dr. Woodard, she will be  
458 responsible for ensuring that the project follows the proposed timeline. Ms. Kiefer will meet weekly  
459 with the study team to discuss oversight of the project and as needed with Dr. Woodard between  
460 team meetings to discuss other project issues. Ms. Kiefer will be located at the Houston VA  
461 IQuEST and supervised by Dr. Woodard. She will have access to the data, including protected  
462 health information, and will be involved in recruiting subjects, obtaining informed consent,  
463 administering survey/interview procedures, and will be directly involved in the data analysis.

464

465 • Sha'Tia Safford, MPH, BA (Research Assistant): Ms. Safford will be sited at the Houston VA  
466 IQuEST and will fulfill the local site regulatory responsibilities. Ms. Safford will work directly with Ms.  
467 Kiefer to assist with day-to-day recruitment of patients, coordination of phone conferences and  
468 meetings, preparation of the adapted EPIC training material for research staff and PACT members,  
469 and data collection/entry. Ms. Safford will have access to PHI data during all phases of the study.  
470 She will be responsible for developing and implementing an overall recruitment plan for study  
471 subjects in the clinical trial as well as recruiting subjects, obtaining informed consent and  
472 administering survey/interview procedures. She may assist with dissemination of products.

473 • Suzette Stine, MBA (Research Assurance & Data Security (RADS) Coordinator): The cost of a  
474 research compliance coordinator is shared by all investigators at the Houston VA IQuEST. The  
475 coordinator directs, coordinates, and supervises the administrative functions of research  
476 compliance at IQuEST. The coordinator audits and monitors all IQuEST research, and aids in the  
477 reporting of compliance issues. The coordinator also provides education to investigators and staff  
478 regarding regulations, policies, and other VA and federal requirements related to research  
479 compliance.  
480

481 • Alex Chau, BS (Data Management Specialist): Mr. Chau will manage the computing resources  
482 needed for timely completion of the project. His duties include hardware and software maintenance  
483 and upgrades on Windows servers and UNIX servers, performing backups, and restoring data  
484 including disaster recovery on a daily basis on all project folders, and management of user/project  
485 accounts, including providing secure accesses to team members. **This is a non-2210 IT  
486 employee.**  
487

488 • Charnetta Brown, MA, BA (Research Assistant) Ms. Brown will be sited at the Hines VA and will  
489 fulfill the local site regulatory responsibilities. Ms. Brown will be supervised by Houston staff and  
490 work directly with Ms. Kiefer to assist with day-to-day recruitment of patients, coordination of phone  
491 conferences and meetings, preparation of the adapted EPIC training material for research staff and  
492 PACT members, and data collection/entry. Ms. Brown will have access to PHI data during all  
493 phases of the study. She will be responsible for developing and implementing an overall

494 recruitment plan for study subjects in the clinical trial as well as recruiting subjects, obtaining  
495 informed consent and administering survey/interview procedures. She may assist with  
496 dissemination of products.  
497

498 • TBD (Research Assistant): The research assistant to be named will be sited at one of the Chicago-  
499 area facilities and will fulfill the local site regulatory responsibilities. The Research Assistant will  
500 work directly with Ms. Kiefer to assist with day-to-day recruitment of patients, coordination of phone  
501 conferences and meetings, preparation of the adapted EPIC training material for research staff and  
502 PACT members, and data collection/entry. The Research Assistant will have access to PHI data  
503 during all phases of the study. S/he will be responsible for developing and implementing an overall  
504 recruitment plan for study subjects in the clinical trial as well as recruiting subjects, obtaining  
505 informed consent and administering survey/interview procedures. S/he may assist with  
506 dissemination of products.

507 • TBD (Research Assistant): The research assistant to be named will be sited at one of the Chicago-  
508 area facilities and will fulfill the local site regulatory responsibilities. The Research Assistant will  
509 work directly with Ms. Kiefer to assist with day-to-day recruitment of patients, coordination of phone  
510 conferences and meetings, preparation of the adapted EPIC training material for research staff and  
511 PACT members, and data collection/entry. The Research Assistant will have access to PHI data  
512 during all phases of the study. S/he will be responsible for developing and implementing an overall  
513 recruitment plan for study subjects in the clinical trial as well as recruiting subjects, obtaining  
514 informed consent and administering survey/interview procedures. S/he may assist with  
515 dissemination of products.  
516

#### 517 **Jesse Brown VAMC, Chicago, IL Personnel**

518 • Howard Gordon, MD (Co-Investigator): Dr. Gordon is a medical internist and clinician researcher at  
519 the Jesse Brown VAMC. He is also Associate Professor of Medicine at the University of Illinois at  
520 Chicago and a core investigator at Hines VA HSR&D Center of Excellence. Dr. Gordon has  
521 extensive research experience in doctor-patient communication and produced the video that we will  
522 use in the EPIC session “How to Talk to Your Doctor”. Dr. Gordon will assist the research team  
523 with study coordination at the Chicago VA sites and will provide clinical insight during the study  
524 related to VISN 12 and study procedures.  
525

#### 526 **Hines VAMC, Hines, IL Personnel**

527 • Brian Hertz, MD (Co-Investigator) Dr. Hertz is the Associate Chief of Staff for Ambulatory Care and  
528 a primary care physician at the Edward Hines VA in Hines, IL. He has worked closely with Dr.  
529 Woodard for several years on projects examining quality of care in VISN 12. In addition, he has  
530 worked closely with Dr. Woodard throughout the development of this project, providing clinical and  
531 practical insight on implementing the study in the VISN 12 PACT setting. Dr. Hertz will assist the  
532 research team with study coordination at the Hines VA and will continue to provide clinical and  
533 implementation insight during the study.  
534

#### 535 **James A. Lovell FHCC, North Chicago, IL**



- 536 • Commander David Damstra, MD (Co-Investigator): Commander Damstra is a DOD Family  
 537 Practitioner at James A. Lovell FHCC. He has a WOC appointment with the VA as part of the  
 538 integrated James A. Lovell FHCC. He has worked closely with Dr. Woodard through development  
 539 of this project, providing clinical and practical insight on implementing the study in a unique VISN  
 540 12 PACT setting (VA/DOD patients). Commander Damstra will assist the research team with study  
 541 coordination at James A. Lovell FHCC and will provide clinical insight during the study related to  
 542 VISN 12 and study procedures.

543 **Table 4.A.i.: Summary of Study Team Roles for Phase 2**

| Name                 | Location    | Role                     | Access to PHI? | Subject Recruitment and Consent | Survey/Interview Procedures | Perform data analysis? |
|----------------------|-------------|--------------------------|----------------|---------------------------------|-----------------------------|------------------------|
| <b>KEY PERSONNEL</b> |             |                          |                |                                 |                             |                        |
| Woodard, L.          | MEDVAMC     | PI                       | Yes            | No                              | No                          | Yes                    |
| Naik, A.             | MEDVAMC     | Co-I                     | Yes            | No                              | No                          | Yes                    |
| Amspoker, A.         | MEDVAMC     | Co-I,<br>Biostatistician | Yes            | No                              | No                          | Yes                    |
| Arney, J.            | MEDVAMC     | Co-I                     | No             | No                              | Yes                         | Yes                    |
| Hundt, N.            | MEDVAMC     | Co-I                     | No             | Yes                             | No                          | Yes                    |
| Gordon, H.           | JBVAMC      | Co-I                     | Yes            | No                              | No                          | Yes                    |
| Hertz, B.            | Hines MVA   | Co-I                     | Yes            | No                              | No                          | Yes                    |
| Damstra, D.          | Lovell FHCC | Co-I                     | Yes            | No                              | No                          | Yes                    |
| <b>STUDY STAFF</b>   |             |                          |                |                                 |                             |                        |
| Kiefer, L.           | MEDVAMC     | Research Coordinator     | Yes            | Yes                             | Yes                         | Yes                    |
| Safford, S.          | MEDVAMC     | Research Assistant       | Yes            | Yes                             | Yes                         | No                     |
| Stine, S.            | MEDVAMC     | Assur. Coord.            | No             | No                              | No                          | No                     |
| Chau, A.             | MEDVAMC     | Data Manager             | No             | No                              | No                          | No                     |
| Brown, C             | Hines MVA   | Research Assistant       | Yes            | Yes                             | Yes                         | No                     |
| TBD                  |             | Clinical Res. Staff      | Yes            |                                 | Yes                         | No                     |

544  
 545 **4.A.ii. Services Provided by Contractors**  
 546 Not applicable: no contractors were involved in Phase 1 or will be involved in Phase 2.  
 547

548 **4.A.iii. Memoranda of Understanding (MOU) or Data Use Agreements (DUA)**  
 549 Phase 1 required no DUA or MOU. For any databases used in Phase 2 that require Data Use  
 550 Agreements or Memoranda of Understanding, we will complete all required DUA or MOU paperwork.  
 551

552 Databases that require a DUA include:  
 553 • Corporate Data Warehouse (CDW): we will complete DUA to access VINCI  
 554

555 In addition, if a DUA or MOU is needed for use of other databases controlled by VA partners, we will  
 556 complete that paperwork as well, prior to using the database for research.

557

558 **5.0 Study Procedures**

559 **5.1 Study Design**

560 **5.1.A. Overall Study Design**

561 The study will be conducted over four years in two phases. In Phase 1, we implemented our  
562 personalized collaborative goal-setting intervention into routine VISN 12 PACT care. To facilitate  
563 implementation, we conducted a formative evaluation of VISN 12 PACTs guided by the PARIHS  
564 framework. This method of evaluation consisted of key informant interviews with providers, staff, and  
565 facility leadership to identify: a) how well PACT members embrace our training/fidelity program for  
566 personalized goal-setting (PARIHS evidence), b) how the intervention sessions can be best embedded  
567 into routine workflows of PACT at a local level (PARIHS context), and c) local PACT members to assist  
568 with recruitment (PARIHS facilitation) of VA staff to conduct the intervention. Phase 1 began during the  
569 first year of the study. In the final year of the study, we will also conduct a summative evaluation of  
570 overall intervention implementation success based on the RE-AIM measures (see table 5 below) of  
571 reach, adoption, and implementation (i.e., cost-effectiveness and fidelity to intervention).

572 In Phase 2, (see Figure 2) we will conduct a randomized controlled clinical trial to assess the  
573 effectiveness of personalized goal-setting in improving clinical and patient-centered outcomes  
574 compared with EUC. The unit of randomization will be at the patient level with patients enrolled into the  
575 personalized goal-setting intervention (EPIC) versus EUC. Outcome assessments will be conducted at  
576 baseline, immediately post-intervention (4 months), and 10 months post-randomization after a  
577 maintenance phase.

578

579 With the assistance of PACT members and using strategies identified in Phase 1 (formative  
580 evaluation), we recruited VA staff who regularly participate in diabetes care to serve as group leaders  
581 and individual session providers for the intervention. In Phase 2, we will also recruit and randomize  
582 Veterans across eligible facilities to participate in our trial.

**Figure 2: Empowering Patients in Chronic Care (EPIC) Study Design (Effectiveness Phase)**

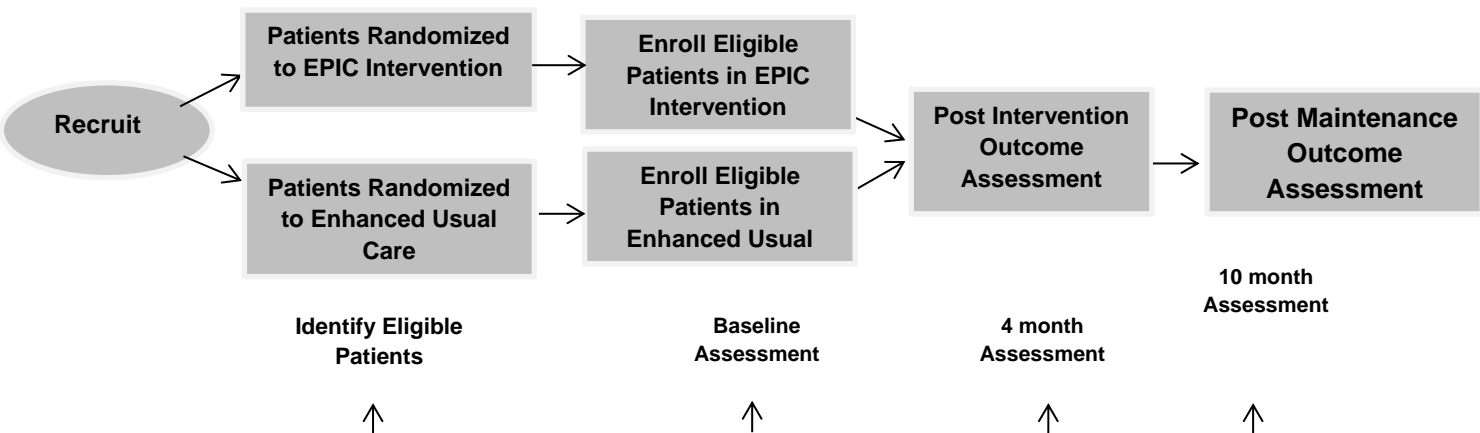

583 Patient-participants will be recruited from PACT patient panels. Patient panels will be screened for  
584 eligibility criteria, and all eligible patients will be approached for informed consent to participate in the  
585 study using an opt-out approach and a structured telephone screening and recruitment process.

586 The study intervention, EPIC (see Figure 3), will consist of six sessions conducted over a  
 587 maximum of 6 months. Each session will include a group visit followed by a one-on-one personalized  
 588 goal-setting visit. The personalized goal-setting sessions will incorporate FHL and activation  
 589 information, allowing the designated study team member to collaborate with patients at their desired  
 590 levels of engagement to develop diabetes self-management goals.

591

592 Patients enrolled in the EPIC intervention will participate in a group session, followed by an  
 593 individual, collaborative goal setting session. Group sessions will be run by a group leader, a VA staff  
 594 member who is a regular provider of diabetes care in VISN12. The group leader will be trained to use  
 595 the EPIC protocol to empower patients in diabetes goal-setting, action planning, and proactive  
 596 communication with PACT members.<sup>11</sup>

Figure 3. Organization of Personalized Goal-Setting Intervention

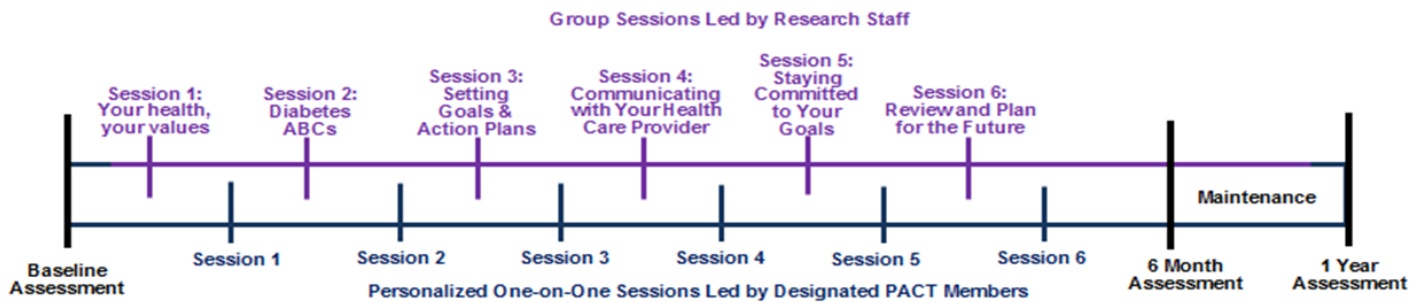

597 Following the group sessions, participants will receive individual, collaborative goal-setting  
 598 sessions with an individual session provider, another VA staff member who is a regular provider of  
 599 diabetes care in VISN12, who is trained by the study staff to lead these goal-setting sessions.  
 600 Individual sessions will follow the group sessions at a mutually convenient time. The individual session  
 601 provider will be trained to a) conduct collaborative goal-setting for diabetes self-management and b)  
 602 understand how to use measures of patient activation and FHL personalized to each patient-participant  
 603 to enhance the collaborative goal-setting process. Designated VISN12 staffers undergoing EPIC  
 604 training will be consented as research subjects and must complete an intervention fidelity assessment  
 605 prior to qualification for the active intervention (§ 5.1.F.).

606 Patients enrolled in the EUC arm will receive routine PACT visits and “enhanced usual care”  
 607 (EUC). Patients randomized to EUC will be referred to the PACT RN Care Manager for diabetes  
 608 management , and will also receive a packet of educational materials regarding diabetes management,  
 609 including a letter delineating the diabetes management resources available at their facility. The PACT  
 610 RN will be directed to provide care as usual. Patients enrolled in EUC will not receive group or  
 611 individual goal-setting information defined by the EPIC protocol and their PACT teamlets will not  
 612 receive personalized information about patient activation or FHL.

613

614 **5.1.B. Phase 2 design overview**

| Table 6: VISN 12 facilities     |                                    |
|---------------------------------|------------------------------------|
| Facility                        | Number of patients with HbA1c ≥ 8% |
| Jesse Brown VAMC<br>Chicago, IL | 1133                               |

615 In Phase 2, we will conduct a cluster randomized  
 616 controlled trial with patients serving as the unit of  
 617 randomization to compare the personalized EPIC intervention  
 618 with EUC. The EPIC intervention will be delivered by VA staff  
 619 members who regularly deliver diabetes care, but who are  
 620 consented as research subjects specifically to collect  
 621 implementation data on the EPIC intervention.

|                                             |      |
|---------------------------------------------|------|
| Lovell FHCC<br>North Chicago, IL            | 515  |
| Hines VA Hospital<br>Hines, IL              | 1353 |
| Adam Benjamin, Jr. CBOC,<br>Crown Point, IN | 785  |
| Total                                       | 3776 |

622 Using data generated in Phase 1, we have recruited a  
 623 group of VA staff who regularly participate in diabetes care to  
 624 serve as the group leaders of the EPIC intervention, as well  
 625 as the individual session providers., In Phase 2, we will consent and enroll them as research subjects.  
 626 Following consent, we will train staff on a rolling basis to lead the EPIC group sessions and to perform  
 627 the personalized, collaborative goal-setting aspects of the intervention. In Phase 2, we will also recruit  
 628 interested patients to participate in the EPIC trial. Simultaneous with training, we will use the Corporate  
 629 Data Warehouse to screen VISN 12 patient panels to identify eligible patients using the criteria below  
 630 (§ 5.1.E.ii.). We anticipate enrolling 428 patients for the intervention (including screen failures who do  
 631 not participate) and 34 VA staff members as group leaders and/or individual session providers. This  
 632 number is highly feasible given the number of eligible PACTs and patients in our targeted VISN 12 &  
 633 Houston facilities (see Table 6). A blinded research staff member will collect baseline laboratory,  
 634 clinical, and survey data at the time of enrollment. An un-blinded research staff member with  
 635 assistance from PACT staff will schedule patients randomized to the EPIC arm to attend six group  
 636 clinic sessions. These EPIC group sessions will be conducted by a trained group leader over no more  
 637 than a six month period. Individual session providers will receive information on FHL and activation for  
 638 patients assigned to the EPIC group. These providers, who have received training in collaborative goal  
 639 setting, will then conduct individual personalized goal-setting sessions following each of the EPIC  
 640 group sessions. The goals and action plans generated during goal-setting sessions as well as any  
 641 medication-related or other issues raised by patient participants will be communicated to the rest of the  
 642 PACT team using the preferred methods elaborated in study Phase 1. Providers conducting the  
 643 individual goal-setting session will work with patients to resolve common issues regarding medications,  
 644 communicate those issues to the prescribing PACT clinician, and subsequently ensure that  
 645 modifications to medication regimens are implemented by patients. For subjects randomized to the  
 646 EUC arm, an un-blinded research staff member with assistance from PACT staff will provide a referral  
 647 to the PACT RN Care Manager for diabetes management. The un-blinded research staff member will  
 648 also mail to the patient the EUC materials. A blinded staff member will obtain all clinical and survey  
 649 data at baseline, post-intervention (4 month follow up assessment) and post-maintenance phase (10  
 650 month follow-up assessment) for all enrolled patient-participants.

651 **5.1.C. PACT Setting.**

652 VISN 12 PACT Setting. We will conduct this study in facilities in VISN 12: the Lovell Federal Health  
 653 Care Center in North Chicago, IL, the Edward Hines VA Hospital in Hines, IL, and the Jesse Brown  
 654 VAMC in Chicago, IL, including a satellite clinic of the Jesse Brown VAMC, the Adam Benjamin, Jr.  
 655 clinic in Crown Point, IN. The facilities are located within 50 miles. All facilities have fully implemented  
 656 PACT. We have targeted two geographic regions (the greater Chicago area and the region of Crown  
 657 Point, IN) to cluster the organization of our research staff and local PACT members who conduct the  
 658 EPIC intervention to better ensure implementation success. In addition, we will leverage available  
 659 resources from our Houston CREATE-VISN 12 partnership, i.e. shared research staff, to facilitate  
 660 implementation. We will target PACTs with the largest number of eligible patients to maximize  
 661 recruitment potential.

662 Houston PACT Setting. Given concern with the availability of staff participants to run the intervention at  
 663 the approved VISN 12 sites, Houston will serve as an additional enrollment site to ensure that we meet

664 the approved Veteran sample recruitment size requirement. The Houston VA has fully implemented  
665 PACT as well and, because the site serves as the PI/SC site, a supporting research staff is in place.

666

#### 667 **5.1.D. Study Population**

668 **5.1.D.i. EPIC group leaders.** The six EPIC group sessions will be delivered by a group leader,  
669 a VA staff member who regularly delivers diabetes care. Specifically, the group leaders will be  
670 responsible for introducing the concepts in each of the six sessions and for facilitating group  
671 discussion; both responsibilities will fall within their normal job duties. These EPIC group leaders will  
672 undergo a standardized training program specific to EPIC conducted by the research staff (§ 5.1.F.).  
673 Each staff member will have time dedicated to complete our training program for the EPIC intervention.  
674 Group leaders will participate in fidelity assessments to ensure internal validity (§ 5.1.F.). The leaders  
675 of the EPIC group sessions at each facility were identified during Phase 1. Diabetes educators and  
676 health promotion disease prevention (HPDP) specialists were identified by network PACT leadership  
677 as being ideally suited to conduct the intervention. They routinely conduct diabetes self-management  
678 classes and are trained in motivational interviewing, which will enhance their effectiveness as leaders  
679 of the EPIC group sessions. Given the implementation focus of the research and shifting staffing  
680 patterns at each facility, all interested VA staff members at participating facilities who provide diabetes  
681 care as part of their regular job duties will be eligible to participate as group leaders.

682 Prior to training in Phase 2, we will consent and enroll the group leaders as research subjects.  
683 Group leaders will be consented as research subjects specifically to collect implementation data on the  
684 EPIC intervention. We expect to enroll 3-7 group leaders at each facility, for a maximum total of 34  
685 subjects.

686

687 **5.1.D.ii. EPIC individual session providers.** The collaborative goal-setting sessions designed to  
688 follow the EPIC group sessions will be delivered by an individual session provider, a VA staff member  
689 who regularly delivers diabetes care. In these individual meetings, staff will assist the Veteran to  
690 develop and personalize a self-management goal and an action plan to reach that goal. Individual  
691 session providers will be drawn from the local population of staff who have experience with goal-setting  
692 and action-planning as a part of the standard diabetes care that they provide. These EPIC individual  
693 session providers will undergo a standardized training program specific to EPIC conducted by the  
694 research staff (§ 5.1.F.). Each staff member will have time dedicated to complete our training program  
695 for the EPIC intervention. Individual session providers will participate in fidelity assessments to ensure  
696 internal validity (§ 5.1.F.). The individual session providers of the EPIC goal-setting intervention were  
697 identified during Phase 1 at each facility. Dietitians, pharmacists, diabetes educators and health  
698 promotion disease prevention (HPDP) specialists were identified by network PACT leadership as being  
699 ideally suited to conduct the intervention. They routinely conduct individual counseling sessions and  
700 are trained in motivational interviewing, which will enhance their effectiveness as participants in the  
701 EPIC intervention. Given the implementation focus of the research and shifting staffing patterns at each  
702 facility, all interested VA staff members who provide diabetes counseling as part of their regular job  
703 duties will be eligible to participate as individual session providers.

704 Prior to training in Phase 2, we will consent and enroll the individual session providers as  
705 research subjects. Individual session providers will be consented as research subjects specifically to  
706 collect implementation data on the EPIC intervention. We expect to enroll 3-7 individual session  
707 providers at each facility, for a maximum total of 34 subjects.

708 **5.1.D.iii. Patient-participants.** Inclusion criteria: Using the Corporate Data Warehouse, we will  
709 identify active patients at participating facilities meeting the study inclusion criteria: 1) ICD-9-CM codes

710 indicating diabetes, and 2) average HbA1c level  $\geq$  8% in the prior 6 months. From data preparatory to  
711 research, we found a total of 3,776 patients who met those inclusion criteria. All of those records will be  
712 screened for the following exclusion criteria to determine eligibility. Exclusion criteria: We will use a  
713 medical record review to exclude potential participants with the following clinical conditions that would  
714 render participation in a group clinic inappropriate: 1) metastatic cancer or receiving hospice care, 2)  
715 limited life expectancy (as identified using a validated algorithm developed in our prior work [see  
716 Attachment 2]),<sup>47</sup> 3) clinician recommendations to not titrate therapy due to prior history of significant  
717 hypoglycemic events, 4) age <18 years, 5) active bipolar or psychotic disorder, 6) documented active  
718 substance abuse, or 7) documented dementia. We estimate that 20% of records will be excluded at  
719 chart review, resulting in approximately 3,020 letters sent to Veterans. We will exclude participants at  
720 the time of screening who report to study staff that they 6) cannot attend bi-weekly group clinic  
721 sessions due to transportation or availability barriers, 7) have significant cognitive impairment (three or  
722 more errors on an established six-item screening exam),<sup>63</sup> 8) have active substance-abuse disorders,  
723 or 9) are not comfortable discussing their health and health care in a peer-group setting.

724 Patients will be secondarily excluded if their HbA1C level falls below 7.5% at baseline. Patients  
725 whose baseline levels fall below 7.5% may have limited ability for meaningful HbA1c change without  
726 significant concerns for hypoglycemia.

727 **5.1.D.iv. Protocol for Randomization into Intervention Groups.** Enrolled Veterans will be randomly  
728 assigned to EPIC or EUC using random numbers generated in SAS PROC PLAN. We estimate that  
729 half of the expected sample of 284 veterans will be randomized to the intervention and half will be  
730 randomized to the enhanced usual care arm. We will utilize the steps described below in **§5.2 and §**  
731 **5.3** to identify, recruit, consent, and enroll patient participants. With the assistance of PACT staff, un-  
732 blinded research staff will coordinate the scheduling of participants to EPIC group intervention sessions  
733 and EUC referrals.

#### 734 **5.1.E. Study Procedures**

735 **5.1.E.i. EPIC Group leader roles and responsibilities.** The EPIC collaborative goal-setting  
736 intervention consists of six, one-hour group clinic sessions followed by one-on-one, collaborative goal-  
737 setting sessions. The intervention is structured to provide patients with training (group sessions) and  
738 support (one-on-one sessions) with diabetes goal-setting. Group leaders will be trained by the research  
739 staff according to the standardized training program (**§5.1.G**), but will have experience with group  
740 diabetes education and/or goal-setting and action planning as a part of the standard diabetes care that  
741 they provide. With the aid of the clinician manual (Attachment 3), group leaders will be responsible for  
742 conducting all 6 of the group training sessions over the course of 3 months, but no more than 6  
743 months. When necessary and appropriate, group leaders may also assist Veterans with the  
744 development of collaborative diabetes-management goals.

745 **5.1.E.ii. EPIC Individual Session Providers roles and responsibilities.** The EPIC collaborative  
746 goal-setting intervention consists of six, one-hour group clinic sessions followed by one-on-one,  
747 collaborative goal-setting sessions. The intervention is structured to provide patients with training  
748 (group sessions) and support (one-on-one sessions) with diabetes goal-setting. Individual session  
749 providers will be trained by the research staff according to the standardized training program (**§5.1.G**),  
750 but will have prior experience with goal-setting and action-planning as a part of the standard diabetes  
751 care that they provide. Individual session providers will be responsible for conducting the one-on-one,  
752 personalized goal-setting sessions that will follow each group session at a time of mutual convenience  
753 to patient and provider.

754

755 Table 7 describes the VA staff involved in conducting the EPIC intervention and their specific  
756 roles and responsibilities.

**Table 7. PACT personnel roles and responsibilities for EPIC interventions**

| Personnel                                                                                     | Roles and responsibilities                                                                                                                                                                                                                                                                                                                                                                                                                  |
|-----------------------------------------------------------------------------------------------|---------------------------------------------------------------------------------------------------------------------------------------------------------------------------------------------------------------------------------------------------------------------------------------------------------------------------------------------------------------------------------------------------------------------------------------------|
| Group Leaders (with background in diabetes education or health promotion/ disease prevention) | <ul style="list-style-type: none"> <li>• Participate in EPIC training to cover: 1) review of individual and group EPIC session content and objectives, 2) theory-driven health coaching techniques, 3) setting collaborative goals and action plans, and 4) personalizing goal-setting and action planning based on FHL and activation levels</li> <li>• Conduct the regular group clinic sessions at VA primary care facilities</li> </ul> |
| Individual session provider (e.g., dietitian or pharmacist)                                   | <ul style="list-style-type: none"> <li>• Participate in EPIC training to a) improve collaborative goal-setting skills, b) review patient-reported activation and FHL measures, c) use these measures to personalize goal-setting with patients</li> <li>• Participate in one-on-one collaborative goal-setting sessions with patients randomized to EPIC intervention</li> <li>•</li> </ul>                                                 |
| PACT teamlet (e.g. physician, NP/PA, nurse)                                                   | <ul style="list-style-type: none"> <li>• Will play important role in working with EPIC interventionists to integrate patients' goals/action plans with their diabetes treatment plan</li> </ul>                                                                                                                                                                                                                                             |
| PACT clerical staff                                                                           | <ul style="list-style-type: none"> <li>• Work with study team to schedule individual and group sessions and order HbA1c tests at 6- and 12-months</li> </ul>                                                                                                                                                                                                                                                                                |

758

759

760

761

762

763

764

765

766

767

768

769

**5.1.E.iii. Procedures for conducting the EPIC intervention.** A blinded research staff member will call subjects prior to randomization to collect verbal health literacy and activation information, as well as a short personal history of prior exposure to diabetes management resources. Following that data collection, the randomization status will be revealed to both the Veteran and the research assistant. The research assistant will then explain the next steps for continued participation. Working with VISN 12 PACT clerical staff, un-blinded research personnel will then schedule subjects randomized to the EPIC intervention to attend six group clinic sessions. The groups will consist of 5-8 individuals. The goal is to keep members of a group consistent over the full length of the intervention period to promote peer-to-peer support.<sup>68</sup> Participants in the EPIC intervention will arrive at the facility at the designated group meeting time. They will receive a patient workbook (Attachment 4) at the first session.

770

771

772

773

774

775

776

777

**EPIC group sessions** consist of 6 one-hour group sessions (see Figure 3) occurring over no more than a 6-month period. The group sessions cover the topics described in Figure 4 below (see also Attachments 3 and 4). Group sessions have a consistent structure involving didactic discussion on the topic of interest (20 minutes), a problem-based group discussion (20 minutes), and a group discussion about applying the topic into the patients' lives (20 minutes). Each patient will receive an EPIC manual that guides the content of the group sessions (see Attachment 4). Manuals are designed to ensure that the materials are easily understandable for all participants, including those with limited health literacy.

778 **EPIC one-on-one support sessions** will follow each group session. Patient-participants will  
 779 meet with an individual session provider for 10-15 minutes to personalize goals and action plans. In  
 780 Phase 1, we developed a menu of 2-3 options that providers can select for conducting the one-on-one  
 781 sessions (e.g., in-person right after group sessions, in-person at another time, telephone based). Each  
 782 individual session provider will have the freedom to choose the option that best fits their usual workflow  
 783 and scheduling process. In preparation for one-on-one sessions, the session provider will receive  
 784 information on their patients' activation and FHL levels at the start of the intervention. We used the key  
 785 informant interviews from Phase 1 to inform our process for delivering these patient-reported measures  
 786 to participating VA staff. In particular, we developed a succinct and actionable format for presenting  
 787 these data and will train the individual session providers on how to integrate the information into goal-  
 788 setting (§ 5.1.F.) The individual session provider will use this information to better personalize the  
 789 development of high quality, collaborative goals and action plans. At the conclusion of the individual  
 790 session, the provider will convey the specified goals and action plans discussed, as well as any

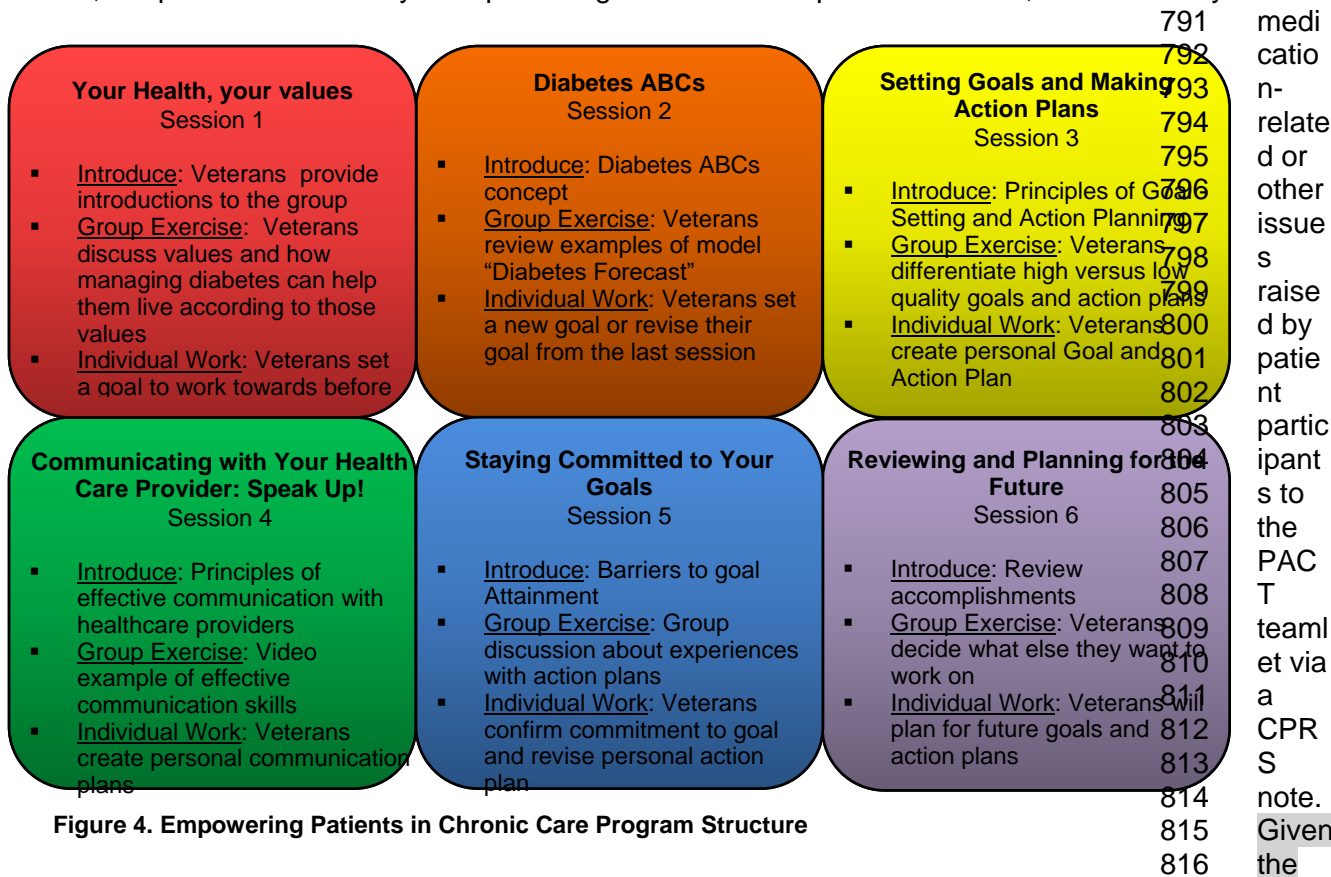

Figure 4. Empowering Patients in Chronic Care Program Structure

817 importance of medication management in the original EPIC study, we developed standardized  
 818 procedures in Phase 1 for medication management, including medication reconciliation, dose titration,  
 819 and addition/initiation of alternate medications. The goal is for the individual session provider to work  
 820 with the Veteran in the course of the individual goal-setting session to resolve common issues  
 821 regarding medications, communicate those issues to the prescribing PACT clinician, and subsequently  
 822 ensure that modifications to medication regimens are implemented by patients.

823 Research staff will contact EPIC patient-participants to schedule post-intervention and post-  
 824 maintenance follow up assessments and HbA1c collection.

825 **5.1.E.iv. Procedures for handling EUC.** The full EUC intervention includes: 1) a referral to the  
 826 PACT RN Care Manager, 2) a packet of educational materials about diabetes management  
 827 (Attachment 5), and 3) a letter from the research staff delineating the diabetes management resources



828 available at their facility and encouraging them to speak to their PACT teamlet about these resources  
829 (Attachment 6).

830 Patient-participants randomized to the EUC intervention will be notified by telephone. A blinded  
831 research staff member will call subjects and prior to randomization will collect verbal health literacy and  
832 activation information, as well as a short personal history of prior exposure to diabetes management  
833 resources. Following that data collection, the randomization status will be revealed to both the Veteran  
834 and the research assistant. The research assistant will then explain the next steps for continued  
835 participation. After randomization, a mailing to include the educational materials and letter from the  
836 research staff will be sent to the EUC patients. Working with PACT clerical staff, unblinded research  
837 staff will then refer patients randomized to EUC to the PACT RN care manager for diabetes care  
838 management. Research staff will also encourage patients to schedule routine visits with their PACT  
839 provider during the six-month active intervention. PACT RN Care managers treating those subjects  
840 randomized to EUC will not receive personalized information about activation and FHL levels for their  
841 patients.

842 Research staff will contact EUC patient-participants to schedule post-intervention and post-  
843 maintenance follow up assessments and HbA1c collection.

#### 844 845 **5.1.F. Training of staff personnel to conduct the EPIC intervention**

846 **5.1.F.i. Overview of training of EPIC group session leaders and individual session providers.** To  
847 ensure internal validity, we will train group session leaders and individual session providers to conduct  
848 the EPIC intervention. They will be selected from a pool of diabetes care professionals, including  
849 education experts and health promotion/disease prevention (HPDP) specialists. We will train each  
850 group leader and individual session providers following our established training protocol.<sup>6</sup> The training  
851 will cover: 1) intervention objectives; 2) basic clinical skills in motivational interviewing and goal setting;  
852 3) overview of the EPIC protocol; and 3) listening to audiotaped examples of the skills used and  
853 participating in role plays and interactive exercises followed by feedback from the study team. At the  
854 initial workshop, manuals to guide them through the EPIC intervention (see Attachment 3) will be  
855 provided. The manual was designed by our study team and was used successfully in our previous  
856 collaborative goal-setting intervention. It contains the contents of the patient manual with specific  
857 notations and instructions for leading patients through the group session manual. Following the initial  
858 training workshop, the study team will conduct ongoing consultation teleconferences with the group  
859 session leaders and individual session providers. The sessions will be led by members of the research  
860 team and will focus on reinforcing workshop content and addressing other issues encountered during  
861 group sessions and one-on-one goal setting sessions.

862 **5.1.F.ii. Training components** The training will include four components: 1) Review of individual  
863 and group EPIC session content and objectives; 2) Theory-driven health coaching techniques; 3)  
864 Setting collaborative goals and action plans; and 4) Personalizing goal-setting and action planning  
865 based on FHL and activation levels. The formal training will last a maximum of 4 hours.

866 The **first component** provides an overview of EPIC including the overall structure, roles and  
867 responsibilities of the group session leaders and the individual session providers , the intervention  
868 materials (i.e., patient-participant and clinician manuals), and session objectives. During this session,  
869 we will also review the fidelity items on which the designated PACT member will be expected to  
870 demonstrate familiarity following the training (**§ 5.1.F.**) and prior to conducting an actual patient  
871 session.

872 The **second component** emphasizes the collaborative coaching nature of goal-setting,  
873 including techniques to build rapport and establish trust (e.g., reflective listening, motivational  
874 interviewing techniques to resolve ambivalence about change). When combined with goal-setting and  
875 action planning (see component three below), use of these techniques is associated with

876 improvements in clinical parameters including HbA1c, lipid control, and weight loss among diabetic  
 877 patients.<sup>69-71</sup> Further, this training will capitalize on the motivational interviewing training that is standard  
 878 for PACTs. We will use the stages of change model to discuss readiness to change and techniques to  
 879 move patient-participants from one stage of readiness to change to the next stage (e.g., contemplation  
 880 to preparation or preparation to action) during this component of training.<sup>72;73</sup> To reinforce learning in  
 881 the context of coaching, trainees will hear audiotapes of brief, scripted vignettes created by our  
 882 research team and practice these techniques through brief provider-patient role plays.<sup>74;75</sup> Group  
 883 discussion following role plays will focus on identifying clinical skills appropriate to use in each  
 884 situation.

885 The **third component** will focus on how to set high quality collaborative goals and action plans.  
 886 After participants learn the aspects of high quality goals (i.e., specific, realistic, deadline oriented), they  
 887 will proceed through goal-setting and action planning role plays with a fellow trainee or local research  
 888 staff. Following this exercise, the trainer will lead the group in a discussion to clarify the lessons from  
 889 the role play; this discussion will incorporate the health coaching techniques discussed in training  
 890 component two. This training sequence has been developed, tested, and modified by Bodenheimer  
 891 and colleagues<sup>76</sup> to train health professionals in goal-setting and action planning to facilitate diabetes-  
 892 related behavioral change.

893 With this foundation, participants will learn strategies to personalize goal-setting and action  
 894 planning in **the fourth component** of the training session. First, we will introduce the concepts of  
 895 patient activation, (i.e., possessing the knowledge, skills, beliefs, and confidence to manage one’s  
 896 health) and health literacy (use of “conversational language” (e.g., “sugar” for glucose). We will  
 897 emphasize how these constructs relate to the patient’s motivation to participate in diabetes self-  
 898 management activities and how to improve communication strategies for patients with low literacy  
 899 levels. (see Table 8). We will discuss characteristics associated with the spectrum of activation levels  
 900 ranging from low to high.<sup>12</sup> Patients with low activation are often overwhelmed and not prepared to  
 901 actively participate in their health care. Conversely, patients with high activation are goal-oriented and  
 902 have developed effective self-management and problem-solving skills. However, despite high levels of  
 903 activation, these patients may have difficulty maintaining healthy behaviors when faced with life  
 904 stressors. Next, participants will learn specific strategies to assist patient-participants at different levels  
 905 of activation. For example, with lower activation levels, we will instruct participants to focus on single  
 906 goals that are important to the patient while providing extra encouragement to help build self-  
 907 confidence, and reinforce the importance of participation. With patients at high activation levels, we will  
 908 train employee participants to center their interactions with patients on maintaining self-management  
 909 behaviors, effective problem-solving to prevent relapse, and adding to existing action plans.

910 Table 8: Patient Activation and Health Literacy Goal Setting Tool

|                                                       |                     | <b>Activation – Having the knowledge, skill, and confidence for chronic disease self-man</b>                                                                                                                                               |                                                                                                                                                                                                                                              |
|-------------------------------------------------------|---------------------|--------------------------------------------------------------------------------------------------------------------------------------------------------------------------------------------------------------------------------------------|----------------------------------------------------------------------------------------------------------------------------------------------------------------------------------------------------------------------------------------------|
|                                                       |                     | <b>Low Activation</b>                                                                                                                                                                                                                      | <b>High Activation</b>                                                                                                                                                                                                                       |
| <b>Health Literacy - The ability to perform basic</b> |                     |                                                                                                                                                                                                                                            |                                                                                                                                                                                                                                              |
|                                                       | <b>Low Literacy</b> | <p><b>Description of Veteran:</b></p> <ul style="list-style-type: none"> <li>• Believes someone else will manage diabetes</li> <li>• Has limited <b>knowledge</b> and <b>skills</b> regarding self-care and diabetes management</li> </ul> | <p><b>Description of Veteran:</b></p> <ul style="list-style-type: none"> <li>• <b>Ready</b> to work on making changes, but may be unsure about what changes to make</li> <li>• May have difficulty understanding complex messages</li> </ul> |

|  |                             |                                                                                                                                                                                                                                                                                                                                                                                                                                                                                                                                                                                                                                                                                                                                                                                                                                                                          |                                                                                                                                                                                                                                                                                                                                                                                                                                                                                                                                                                                                                                                                                                                                                                                                                                                                                                                            |
|--|-----------------------------|--------------------------------------------------------------------------------------------------------------------------------------------------------------------------------------------------------------------------------------------------------------------------------------------------------------------------------------------------------------------------------------------------------------------------------------------------------------------------------------------------------------------------------------------------------------------------------------------------------------------------------------------------------------------------------------------------------------------------------------------------------------------------------------------------------------------------------------------------------------------------|----------------------------------------------------------------------------------------------------------------------------------------------------------------------------------------------------------------------------------------------------------------------------------------------------------------------------------------------------------------------------------------------------------------------------------------------------------------------------------------------------------------------------------------------------------------------------------------------------------------------------------------------------------------------------------------------------------------------------------------------------------------------------------------------------------------------------------------------------------------------------------------------------------------------------|
|  |                             | <ul style="list-style-type: none"> <li>• Lacks <b>confidence</b> in ability to manage diabetes</li> <li>• Focused on the <b>present</b> more than long term consequences</li> <li>• May have difficulty understanding complex health messages</li> <li>• May suffer from depression</li> </ul> <p><b>Provider Actions to Take:</b></p> <ul style="list-style-type: none"> <li>• Ask about what <b>motivates</b> Veteran</li> <li>• Set smaller, specific <b>goals</b>, walk through steps to achieve goals and reinforce each <b>achievement</b></li> <li>• Ensure <b>understanding</b> by asking Veteran to repeat back information</li> <li>• Present essential information first if in written format</li> <li>• Consider referral for depression screening</li> </ul>                                                                                                | <p><b>Provider Actions to Take:</b></p> <ul style="list-style-type: none"> <li>• Ask about what is currently <b>motivating</b> the Veteran and reinforce positive actions</li> <li>• Help Veteran identify and overcome barriers/challenges that are preventing self-management</li> <li>• Evaluate <b>knowledge gaps</b> by asking patient about his or her understanding of diet and medication</li> <li>• Present essential information first if in written format</li> <li>• Ensure <b>understanding</b> by asking Veteran to repeat back information</li> <li>• Help patient create tools with visual cues for diabetes management (ex: medication chart with specific times and pictures instead of phrases like "twice daily")</li> </ul>                                                                                                                                                                           |
|  | <p><b>High Literacy</b></p> | <p><b>Description of Veterans:</b></p> <ul style="list-style-type: none"> <li>• <b>Overwhelmed</b> and lacking in self-efficacy to make changes</li> <li>• Not empowered to gain or use <b>knowledge</b> and <b>skills</b> for self-care and diabetes management</li> <li>• Focused on the <b>present</b> more than long term consequences</li> <li>• May suffer from depression</li> </ul> <p><b>Provider Actions to Take:</b></p> <ul style="list-style-type: none"> <li>• Ask about what <b>motivates</b> Veteran</li> <li>• Set smaller, specific <b>goals</b> and reinforce each <b>achievement</b></li> <li>• Ask Veteran how he/she will find new information or develop new skills for care</li> <li>• Emphasize how diabetes can improve the patient's life <b>now</b> (i.e. more energy, etc)</li> <li>• Consider referral for depression screening</li> </ul> | <p><b>Description of Veteran:</b></p> <ul style="list-style-type: none"> <li>• May have experienced an event or insight that convinced him or her to take action</li> <li>• Believes <b>diabetes is important</b> and that he/she has the ability to manage it</li> <li>• Has the <b>background</b> to help learn skills to manage diabetes</li> <li>• Veteran may be ready for challenging goals but his/her expectations may not be realistic</li> </ul> <p><b>Provider Actions to Take:</b></p> <ul style="list-style-type: none"> <li>• Ask about what is currently <b>motivating</b> the Veteran and reinforce positive actions</li> <li>• Help set realistic goals</li> <li>• Ask the Veteran how they will maintain goals during times of stress</li> <li>• Focus on "<b>relapse prevention</b>" efforts. If he/she has a setback, normalize this and help them restore his or her source of motivation.</li> </ul> |

911 To personalize goal-setting and action planning around levels of health literacy (see Table 8),  
912 participants will learn widely advocated interactive communication strategies for patients with low  
913 literacy levels.<sup>77</sup> Strategies will include the use of “conversational language” (e.g., “sugar” for glucose)  
914 and simple techniques such as making eye contact to promote patient understanding. Participants will  
915 also learn and practice the “teach back” technique to verify patients’ understanding of the information  
916 discussed in the one-on-one sessions.<sup>77</sup> They will be instructed to assess and re-assess understanding  
917 until the patient demonstrates comprehension by correctly repeating the content back to the PACT  
918 member each time a new topic is introduced or a new goal is set. Using “teach back” has been shown  
919 to improve glycemic control among diabetes patients with low literacy levels.<sup>77</sup> To personalize goal-  
920 setting based on literacy, participants will learn how to simplify specific goals (e.g., using the plate  
921 method vs. reading food labels) within a general category (e.g., diet) for patients with limited FHL  
922 (Table 8).

923

924 **5.1.F.iii. Fidelity measures.** We will use three strategies to assess fidelity to the conduct of the EPIC  
925 intervention. We used these strategies in our previous trials<sup>79;80</sup> to ensure that the intervention is  
926 conducted as intended:

927 1) Number of treatment sessions: We will track the number of treatment sessions that each  
928 patient-participant actually receives compared to the prescribed number of sessions (i.e., six group  
929 sessions and six one-on-one sessions). This is the only measure that will be applied to both individual  
930 and group sessions.

931 2) Objective ratings of fidelity along two dimensions: intervention adherence and intervention  
932 proficiency. Members of our study team have previously developed and tested a fidelity measure<sup>79; 80</sup> to  
933 objectively rate how well an individual has followed a behavioral or self-management support protocol  
934 during a one-on-one encounter with a patient. For the current study, the fidelity measure assesses  
935 adherence of the participant to the prescribed personalized goal-setting intervention protocol and the  
936 participant’s proficiency, or rather, their skillfulness (e.g., building rapport and creating a therapeutic  
937 environment) in conducting the group sessions and/or the personalized goal-setting. These ratings are  
938 for the purpose of ensuring internal validity to the research. They will not be shared with participants’  
939 supervisors or negatively affect their job in any way.

940 3) We will also ask patient-participants to  
941 provide a self-report of their relationship with the PACT-member conducting their collaborative goal-  
942 setting sessions. We will use an Exit Interview survey (modified Client Satisfaction Questionnaire  
943 CSQ-8) (see Attachment 7)<sup>81; 82</sup> to determine patient-participants’ perceptions of satisfaction with the  
944 service received from the study provider at the last EPIC session. Fidelity ratings of adherence and  
945 proficiency have been used in our previous trials along with the CSQ.<sup>81; 82</sup> Greater description of our  
946 fidelity ratings and CSQ measurements are provided below (**§5.1.G.a.**).

### 946 **5.1.G. Study Variables**

947 **5.1.G.a. Fidelity Measures.** We will also measure, as described in **§ 5.1.F.iii.**, fidelity to the intervention  
948 in the domains of adherence and proficiency. **1. Objective ratings for individual session providers.** For  
949 individual session provider, adherence and proficiency will be rated after providers have completed the  
950 training, prior to the first personalized goal-setting session, in the form of a role-play assessment.  
951 Providers who fall below an acceptable level of adherence and proficiency will receive consultation by  
952 the study team to address concerns and will be asked to repeat the role-play exercise until an  
953 acceptable level is achieved. **2. Objective ratings for group leaders.** For group leaders, we will  
954 determine adherence ratings based on how closely they adhere to the manual structure and whether or  
955 not they cover specific session content. Adherence items will clearly delineate the objectives for each  
956 session discussed in the second training component above. Proficiency scores will be based on group  
957 leaders’ skillfulness in building rapport with the patient-participant and establishing a therapeutic  
958 environment conducive to the development of collaborative goals and action plans (e.g., used language  
959 that the patients could follow and understand, answered patient’s questions and concerns). The  
960 measure also assesses skillfulness in the use of procedural techniques that are consistent with the

961 objectives of the intervention (e.g., identified examples and assignments that matched the patient's  
962 needs. Group sessions will be audio-recorded when patient-participants agree to allow for fidelity  
963 ratings. Research staff will listen live via telephone to those group sessions where consent for audio-  
964 recording was not attained by all group participants. Group leaders who fall below an acceptable level  
965 will receive consultation by the study team to address areas of concern. No further patients will be  
966 assigned to these providers until these individual providers improve. We will provide verbal feedback to  
967 staff participants based on performance<sup>3</sup>. Perceptions of client satisfaction with treatment. Patient-  
968 participants will rate their perceptions of client satisfaction with their group leader following the last  
969 group session using an exit interview survey, The self-reported paper survey will ask all of the CSQ-8  
970 items (rated on a 4-point Likert scale designed to measure client satisfaction with the services  
971 received), as well as additional questions about the EPIC experience. The exit interview survey also  
972 asks about interest in future follow up about satisfaction with the EPIC experience to identify a potential  
973 sample for future study (see Attachment 7). In addition to overall perceptions of client satisfaction, the  
974 exit interview provides a perception of the perceived value of service received; agreement between  
975 patient and provider about treatment goals and tasks; and the effective quality of their bond. The CSQ-  
976 8 measure has adequate internal consistency and overall scores (Cronbach's  $\alpha = .92-.93$ ) for 8-item  
977 scale.<sup>81; 82</sup>

978  
979  
980

#### **5.1.H. Data Collection Strategy**

981 Blinded research staff will collect data from patient-participants after all assessments (baseline,  
982 post-intervention, and post-maintenance follow-ups). Data to be collected include self-reported  
983 measures (see Table 10) and an HbA1c level. Participants will receive \$25 for completing the  
984 assessment at each time period, for a total of \$75 throughout the course of the study.

985 **5.1.H.i. Baseline Data Collection and Assessment.** Baseline data collection will occur in person  
986 following informed consent at the introductory meeting. A research assistant will be present to distribute  
987 the self-reported measures and to answer any questions that participants may have. The self-reported  
988 measures will be completed on paper following consent and collected by the research staff. The  
989 research staff will review for incomplete measures to guard against missing data. Paper data will be  
990 entered by research staff into an Access database for analysis.

991 Following the introductory meeting, participants will visit the lab to have blood drawn for a  
992 baseline HbA1c level. Blinded research staff will coordinate HbA1c collection with PACT team  
993 assistance.

994 Additional verbal baseline measures of functional health literacy, activation and prior exposure  
995 to diabetes management resources will be collected by research staff via telephone. These measures  
996 will be collected verbally during the randomization call because subjects with limited health literacy may  
997 not be able to read or fully comprehend a written measure.<sup>50; 90</sup>

998 **5.1.H.ii. Data Collection at Follow Up Assessments.** Post-intervention follow up assessments  
999 will be targeted for collection at 5-months after the date of randomization, with assessments occurring  
1000 no earlier than 4 months after randomization and no later than 6 months after randomization. The  
1001 assessment following the maintenance phase (Figure 3) will be targeted for collection at 10-months  
1002 after the date of randomization. Self-reported measures at follow up assessments will be collected by  
1003 central research staff via telephone using a structured data collection tool. To guide completion of the  
1004 telephone interview, participants will be mailed blank assessment packets for reference. Blinded  
1005 research staff will be trained to administer questionnaires by telephone at follow-up assessments and  
1006 to instruct participants on how to accurately respond to questionnaires. A structured guide will steer  
1007 participants through response options. We have implemented these procedures in previous studies to

1008 improve data collection and reduce missing data. Patient assessments will not be audio-recorded  
1009 during the study.

1010 Study staff, working with PACT clerical staff, will schedule a lab visit for HbA1c within 2 weeks  
1011 of the target data collection time. When a clinical HbA1c lab value is available within the data collection  
1012 window, it will be used for the research analysis.

1013 Study staff will also perform chart abstraction of patient-level characteristics and clinical or  
1014 PACT/facility variables that may account for confounding. The patient-level characteristics will include:  
1015 weight, body mass index, Deyo comorbidity score, receipt of other related treatments (e.g. diabetes  
1016 education), and primary care visits in the last 12 months.

1017 **5.1.H.iii. Attrition/Retention Estimates.** Given the benefits of the computerized patient record  
1018 and our prior experience with VA participants, we expect that rates of missing data for primary  
1019 outcomes will be <15%. While we may experience a lower adherence with EPIC group sessions, it is  
1020 reasonable to anticipate having primary outcomes data for  $\geq 85\%$  of participants, as reflected in our  
1021 sample size and power estimates. To handle missing data, we will conduct sensitivity analyses using  
1022 tests for data missing completely at random and tests for nonrandom missing-ness. These analyses  
1023 will allow us to evaluate whether the reasons for loss to follow-up at the various time periods are  
1024 related to the observed values of the outcome variables. Additionally, we will plot the data over time to  
1025 visually assess changes in outcomes from baseline to 1-year and to indicate whether additional terms  
1026 are needed in the models to account for nonlinearity over time.

1027

## 1028 **5.1.I. Study Variables**

1029 **5.1.I.a. Screening Interview.** The screening interview will be conducted over the phone and will  
1030 identify exclusionary variables by self-report that would render participation in a group clinic  
1031 inappropriate: 1. Substantial hearing or vision loss, such that participation with the materials and group  
1032 exercises would not be possible. 2. Transportation or availability barriers, such that would prevent the  
1033 participant from presenting in person on a regular basis. 3. Unwillingness to discuss their health and  
1034 health care in a peer-group setting. 4. Cognitive functioning. Cognitive functioning will be assessed  
1035 using a six-item screening tool that has been validated for telephone use.<sup>83</sup> 5. Current active  
1036 substance abuse. We will administer modules from the MINI, a short structured interview used to  
1037 identify mental health conditions including substance abuse according to DSM-IV.<sup>84</sup> It is appropriate for  
1038 telephone screening (Attachment 9 and 10).<sup>85</sup>

1039 **5.1.I.b. Primary Outcomes.** 1. **Diabetes Control Measure.** HbA1c is an established measure of  
1040 diabetes control and a strong predictor of subsequent health outcomes related to diabetes. There is  
1041 consensus that levels >7% should be treated because of their association with both cardiovascular risk  
1042 and microvascular end-organ damage (e.g., kidney failure).<sup>86</sup> Our eligibility criteria of HbA1c of  $\geq 8\%$  at  
1043 baseline allows for detection of a clinically significant change without limiting enrollment to only those  
1044 with very poor control or other selective groups. 2. **Diabetes-related Distress Scale (DDS).** DDS, a 17-  
1045 item instrument that assesses psychological burden specific to diabetes care (see Attachments 7, 8,  
1046 and 11),<sup>87</sup> has high internal consistency, reliability ( $\alpha = 0.93$ ) and validity with self-care behaviors ( $r =$   
1047  $.30$ ,  $P < .001$ ) and physical activity ( $r = .13$ ,  $P < .01$ ). DDS scores correlate with HbA1c levels and are a  
1048 robust measure of other clinically significant diabetes self-management endpoints.<sup>88</sup> Phase 2 study  
1049 measures and the data collection timeline are outlined in Table 10.

1050 **5.1.I.c. Baseline Covariates.** 1. **Patient-Level Characteristics (Self-report):** We will collect date  
1051 of birth, gender, race, education, living situation [alone or not], social support, VA copay status,  
1052 employment status, and prior receipt of related treatments. 2. **Patient-Level characteristics** will be  
1053 obtained by chart review and from the Corporate Data Warehouse. (Chart review) A trained research

1054 assistant will conduct a structured chart review to extract data on relevant weight, body mass index,  
1055 Deyo comorbidity score, receipt of other related treatments (e.g., diabetes education), and primary care  
1056 visits in the prior 12 months. (Corporate Data Warehouse) We will ascertain adherence to refills of  
1057 prescribed medications (medication possession ratios for all diabetic medications including insulin) for  
1058 enrolled patients. 3. Health System / Clinic Characteristics: We will collect facility, primary care, and  
1059 PACT characteristics from the Corporate Data Warehouse to account for potential confounding. 4.  
1060 Patient self-management knowledge and understanding of diabetes will be assessed using a validated  
1061 13-item measure that has demonstrated adequate internal consistency ( $\alpha = 0.68$ ) and correlation with  
1062 HbA1c values.<sup>89</sup> 5. Patient-reported measures: We will assess levels of FHL and patient activation at  
1063 baseline. These measures will be collected verbally during the randomization call because subjects  
1064 with limited health literacy may not be able to read or fully comprehend a written measure.<sup>50; 90</sup> These  
1065 measures will be reported to the EPIC interventionists and blinded for those in the EUC arm. **A)**  
1066 **Functional Health Literacy**: We will use three questions developed by Chew et al and the eight  
1067 question SKILLD survey, developed by Rothman et al(see Attachment 12).<sup>50; 90; 91</sup> They have been  
1068 validated across multiple VA samples to correlate with expanded measures of health literacy including  
1069 the Rapid Estimate of Adult Literacy in Medicine (REALM) and Test of Functional Health Literacy in  
1070 Adults, short form (S-TOFLA).<sup>50;91</sup> These items require less than three minutes to complete and have  
1071 been validated among patients with diabetes.<sup>92</sup> **B) Patient Activation**: The Patient Activation Measure  
1072 (PAM) assesses patients' skill, confidence, and knowledge in managing issues related to their  
1073 healthcare (see Attachment 12).<sup>12</sup> This 13 item scale can be completed in less than ten minutes. PAM  
1074 scores have been associated with diabetes outcomes in primary care samples.<sup>36</sup>

1075 5.1.I.d. Predictors and Mediators of Intervention Outcomes. 1. Self-Efficacy for Diabetes Self-  
1076 Management is an eight-item instrument (Cronbach's  $\alpha = 0.83$ ) that measures confidence in performing  
1077 specific diabetes management tasks with a per item mean of  $6.87 \pm 1.8$ . It has demonstrated correlation  
1078 with HbA1c levels.<sup>89</sup> 2. Medication Adherence. We will measure adherence to prescribed diabetes  
1079 medications using pharmacy refill records from the Corporate Data Warehouse. For each identified  
1080 medication we will calculate medication possession ratios and refill gaps (See Attachment 7, 8, and  
1081 11). We will also capture by self-report the Morisky Medication Adherence scale. This scale allows for  
1082 identification of patients at highest risk for poor outcomes due to non-adherence as well as recognition  
1083 of barriers to medication compliance. Responses are scored using a dichotomous scale (yes = 0; no =  
1084 1) with higher scores reflecting better medication adherence. The scale has been shown to have good  
1085 concurrent and predictive validity as well as high internal consistency, indicating good reliability  
1086 (Cronbach's  $\alpha = 0.83$ ).<sup>93</sup> 3. Depression Symptoms. The PHQ-8 is an eight-item instrument (Cronbach's  
1087  $\alpha = 0.83$ ) that measures depressive symptoms.<sup>94;95</sup> 4. Exercise. The Lorig Exercise scale is a six item  
1088 instrument that measures exercise behavior during a typical week. No Internal reliability reported; test  
1089 re-test for stretching and strengthening  $r = .56$ ; test-retest for aerobic exercise  $r = .72$ .<sup>96</sup> 5. Diet. The Diet  
1090 scale is a ten-item (Cronbach's  $\alpha = 0.73$ ) instrument developed as part of the Diabetes Self-Care  
1091 Activities survey, a 25- item instrument that measures perceived adherence to diabetes self-care  
1092 recommendations.<sup>97</sup> 6. Goal-Setting Evaluation Tool for diabetes (GET-D) is an objective rater scale  
1093 developed and validated for scoring the quality of goals and action plans articulated by patients in our  
1094 prior goal-setting studies (see Attachment 7, 8, and 11). 5. Treatment Fidelity. We will also use a  
1095 measure, described in § 5.1.F.iii., to objectively rate staff member fidelity to the intervention.

1096  
1097  
1098

1099

1100

| Table 10. Measures                                                                   | Screen | Baseline | 4 M | 10 M | Measure                                           | Baseline | 4 M | 10 M |
|--------------------------------------------------------------------------------------|--------|----------|-----|------|---------------------------------------------------|----------|-----|------|
| Screening protocol                                                                   | X      |          |     |      | <u>Intervention Mediators and Moderators</u>      |          |     |      |
| <u>Primary outcome variables</u>                                                     |        |          |     |      | PHQ-8<br>Diabetes Self-Care Self-Efficacy         | X        | X   | X    |
| HbA1c levels                                                                         | X      | X        | X   | X    | Diet/Exercise                                     | X        | X   | X    |
| Diabetes Distress Scale                                                              |        | X        | X   | X    | Pharmacy refills (database)                       | X        | X   | X    |
| <u>Baseline Covariates</u>                                                           |        |          |     |      | Goal-Setting Evaluation Tool                      | X        | X   | X    |
| Patient Activation Measure                                                           |        | X        | X   | X    | Attendance in group visits                        |          | X   | X    |
| Functional Health Literacy measure                                                   |        | X        |     |      | <u>Post-intervention Implementation variables</u> |          |     |      |
| The Spoken Knowledge in Low Literacy in Diabetes (SKILLD) Knowledge Assessment Scale |        | X        |     |      | Patient exit interviews (Attachment 7)            |          | X   |      |
| Patient Socio-demographics                                                           |        | X        |     |      | Clinician exit interviews (Attachment 13)         |          |     | X    |
| Baseline clinical characteristics                                                    |        | X        |     |      | <u>Summative implementation variables</u>         |          |     |      |
| PACT and facility characteristics                                                    |        | X        |     |      | Reach and Adoption measures                       | X        | X   | X    |
| Patient knowledge & understanding of DM                                              |        |          |     |      | Fidelity measures                                 | X        | X   | X    |
| EQ-5D                                                                                |        | X        | X   | X    |                                                   |          |     |      |
|                                                                                      |        | X        | X   | X    |                                                   |          |     |      |

1101

1102

### 1103 5.1.J. Potential Risks

1104 The potential risks of harm to study participants are low for all phases of this study. In Phase 1, the key  
 1105 informant interviews solicited information on how best a) to adapt EPIC to include point-of-care  
 1106 information on patient activation and functional health literacy; and b) to integrate the intervention into  
 1107 routine work flows. The primary risk to clinician and staff participants was loss of time and potential  
 1108 breach of confidentiality.

1109

1110 The risks for staff participating in Phase 2 of the study are also considered minimal for this project  
 1111 because diabetes care is part of their regular clinical duties. There is a small possibility for loss of  
 1112 confidentiality, although participants will be assigned unique, study ID#s, and all analyses will be  
 1113 blinded.

1114

1115 For patient-participants in Phase 2, this trial poses minimal risk; however, there are still some potential  
 1116 risks associated with the proposed tests to assess the impact of the intervention, as well as the  
 1117 intervention itself. Risks associated with the assessments are low given that the items assessed are  
 1118 normal daily activities including blood draws that are conducted as part of the standard of care. There  
 1119 is also a small risk for breach of confidentiality, but patient-participants will also be assigned unique,



1120 study ID#s for analysis and all results will be reported in aggregate. With our eligibility criteria and multi-  
1121 gated recruitment approach, we should be able to effectively screen-out any individuals for whom this  
1122 intervention is contraindicated. However, because this intervention aims to improve patients'  
1123 management of their health through assisting in the implementation of self-management changes, a  
1124 small risk remains that some patients may experience hypoglycemia after successfully making these  
1125 modifications. We will closely monitor these potential symptoms and have developed a protocol for  
1126 interceding whenever hypoglycemia symptoms manifest. We have successfully utilized this protocol in  
1127 prior studies.

1128  
1129 **5.1.K. Protection Against Risk**

1130 To ensure protection against potential risks, Phase 1 was approved by the Baylor College of Medicine  
1131 Institutional Review Board and the Michael E. DeBakey VA Medical Center Research and  
1132 Development Committee. The protocol for Phase 2 will be approved by, the VA Central IRB. In  
1133 addition, we will obtain approval from the appropriate local VISN 12 and Houston-based VA R&D  
1134 committees.

1135  
1136 The following precautions will be taken with both staff and patient-participants to address possible  
1137 apprehension with disclosing health care related information. Study participants will be assured that:

- 1138 • Participation is voluntary;
- 1139 • They do not have to answer any questions with which they are uncomfortable;
- 1140 • They can discontinue study participation at any time; and
- 1141 • Participation will in no way affect the care that patients receive at the VA or employment status  
1142 for VISN12 or Houston staff members.

1143  
1144 In addition, the following precautions will be taken to minimize the risk of loss of confidentiality for all  
1145 participants in the study:

- 1146 • All paper patient data will be coded by study ID without identifying information, and any  
1147 personal identifiable data will be stored separately behind two locks in a cabinet within the PI's  
1148 office. Access to these files will be restricted to study personnel.
- 1149 • All electronic data will be maintained on IQEST's secure and fully backed up UNIX data  
1150 server, with appropriate ID, password, and data access restrictions.
- 1151 • All study results and accompanying publications will be anonymous, and will not contain  
1152 identifiable information.

1153  
1154 Some patients may experience clinically significant symptoms of hyper or hypoglycemia during the  
1155 course of the intervention. We will have protocols for addressing this risk by:

- 1156 a) First alerting study PIs and then participants' PACT provider when symptoms are more than  
1157 minor,
- 1158 b) Assisting participants to develop communication action plans with clinicians when symptoms  
1159 are mild but warrant discussion with clinicians, and the
- 1160 c) Reporting significant adverse events to the Institutional Review Board (IRB) when emergent  
1161 care is required.

1162  
1163 Each step will have a protocol specific to each facility's workflows and regulation, and we will then train  
1164 local study staff, group leaders and individual session providers on the implementation of the protocols  
1165 accordingly.

1166  
1167 Our protocols for hypoglycemia were developed from the original EPIC study as well as adaptations  
1168 from a current VA MERIT study (PI: Naik) involving behavioral coaching for Veterans with diabetes and  
1169 depression. These protocols were approved by the PACT leadership at the Michael E. DeBakey VA  
1170

1171 and the Houston R&D committee and we will develop a similar procedure for the EPIC study at each  
1172 participating facility.

1173

1174 **5.1.L. Potential Benefits of the Proposed Research and Importance of the Knowledge to be**  
1175 **Gained**

1176 This study will provide valuable information regarding use of patient-reported measures and a goal-  
1177 setting intervention integrated into routine care to guide treatment goals and development of action  
1178 plans to improve care in high risk patients. The use of patient-reported measures of activation and  
1179 functional health literacy to inform treatment decisions in routine care has not been previously  
1180 assessed. Further, although the goal-setting intervention that will be adapted for this study has been  
1181 demonstrated to improve outcomes in a clinical trial setting, it has not been assessed when  
1182 incorporated into routine care. Thus, we anticipate that the information garnered from this work will not  
1183 only improve outcomes, but will also inform more patient-centered approaches to chronic illness care.

1184

1185 The study will also generate important data on the readiness, process, and success of implementation  
1186 of a widely disseminated diabetes collaborative goal-setting intervention and its impact on diabetes  
1187 outcomes. In addition to facilitating the local implementation of study protocols, we believe important  
1188 generalizable knowledge will be generated from this work that can be applied to future intervention  
1189 dissemination and implementation.

1190

1191 As a benefit of participation, patient-participants may also develop skills to set high-quality treatment  
1192 goals and action plans targeting diabetes self-care. This intervention may potentially improve  
1193 participants' overall health, and self-management behaviors for diabetes.

1194

1195 Staff participants will be trained in providing effective behavioral health coaching, which will contribute  
1196 to their professional development and may provide benefit for their clinical practice outside of this  
1197 intervention.

1198

1199 **5.1.M. Protections for vulnerable populations**

1200 No potential participant will be excluded based on gender or minority status. Prior work has shown a  
1201 2% to 5% recruitment rate for women in this age group. We expect to have a comparable female  
1202 population for this study. The racial ethnic composition of patients with the study conditions receiving  
1203 care within VISN 12 is approximately 77% non-Hispanic white, 14% non-Hispanic black, and 9% other.  
1204 Our goal is to achieve a similar racial ethnic distribution in our study cohort of patient participants.

1205

1206 To guard against any undue influence or coercion by the study on the administering institution's  
1207 employee participants, the consent process will emphasize the voluntary nature of the research by  
1208 including the following statements in the consent form: Participation in this study is voluntary and will  
1209 not affect your current or future employment status. There is no penalty for refusing to participate and  
1210 you may withdraw your participation in the study at any time. Additionally, your identifying information  
1211 and any opinions, insights or information you share will be kept strictly confidential.

1212

1213 Given that our study focuses on diabetes and risk factors for cardiovascular disease in Veterans,  
1214 children, adolescents and pregnant women will not be included.

1215

1216

1217

1218 **5.1.N. Data and Safety Monitoring**

1219 The project's data and safety monitoring board will be chaired by Dr. Drew Helmer, Director of War-  
1220 Related Illness and Injury Study Center at the East Orange VA Medical Center in New Jersey. Dr.  
1221 Helmer has experience directing PACT teams and will be responsible, along with Dr. Woodard, for  
1222 directing the data safety and monitoring for the proposed project. Dr Amspoker will serve as project

1223 statistician and methodologist. She will have primary responsibility for preparing the data and safety  
1224 monitoring plan, ensuring that monitoring is timely and effective, and responding to recommendations  
1225 and findings that emanate from monitoring activities. Monitoring will be performed throughout the  
1226 proposed study via quarterly in-person meetings or teleconferences. At each of these meetings, the  
1227 team will review the status of data collection and monitoring, as well as the clinical status/progress of  
1228 research participants.

1229  
1230 At each quarterly meeting, the project coordinator will provide the following information: number of  
1231 participants entering the study, status with respect to meeting recruitment targets, percentage of  
1232 patients assessed who enter the study, number of drop-outs, reasons for dropping out, percentage of  
1233 patients at each stage of the project, and percentage of assessments completed at each assessment  
1234 point. Information about any adverse events (including IRB reporting of short- and long-term remedies)  
1235 also will be presented. By examining this information, the data and safety monitoring team will keep  
1236 abreast of critical issues regarding recruitment and data integrity.

1237  
1238 On a weekly basis, Dr. Woodard will meet with study staff to provide supervision and review the clinical  
1239 status of all participants. Study staff also will notify at least one supervisor immediately if at any point a  
1240 patient shows the need for urgent treatment (e.g., hypoglycemic symptoms). This type of information  
1241 will be communicated immediately, with timely consultation about an appropriate course of action.

1242  
1243 Annual feedback will also be provided to the VA Central IRB Data Safety and Monitoring Board, as well  
1244 as the local Research and Development Committees of participating facilities, including the Michael E.  
1245 DeBakey VA Medical Center Research and Development Committee.

1246  
1247 All unanticipated serious adverse events (U-SAEs) will be reported to the VA Central IRB within five  
1248 business days. U-SAEs will be reported to VA Central IRB regardless of their relationship to the  
1249 research. Additionally, all hospitalizations related to a hypoglycemic event (SAE) will be reported to the  
1250 VA Central IRB within five business days (§ 6.0) . All protocol deviations, violations, and/or  
1251 noncompliance will be reported to the VA Central IRB within five business days of the reporting  
1252 individual becoming aware of the occurrence.

1253

1254

## 1255 **5.2 Recruitment Methods**

1256 5.2.A. Staff participants' eligibility criteria. The leaders of the EPIC group sessions at each facility,  
1257 as well as individual session providers were initially identified and recruited during Phase 1 which  
1258 was approved by the local Institutional Review Board for Baylor College of Medicine and Affiliated  
1259 Hospitals (Protocol Number H-33772). In the event we need to identify and recruit additional  
1260 interventionalists after Phase 1, we will reach out to recruit eligible providers in VISN 12 and in  
1261 Houston with an opt-out email (Attachment 17).

1262

1263 Diabetes educators and health promotion disease prevention (HPDP) specialists were  
1264 identified by network PACT leadership as being ideally suited to lead the group intervention. They  
1265 routinely conduct diabetes self-management classes and are trained in motivational interviewing, which  
1266 will enhance their effectiveness as leaders of the EPIC group sessions. These two classes of  
1267 employees, along with dietitians and clinical pharmacists, were identified as being ideally suited as  
1268 providers of the collaborative, individual goal-setting sessions. These employees routinely conduct  
1269 individual counseling and sometimes goal-setting with diabetic patients. Given the implementation  
1270 focus of the research and shifting staffing patterns at each facility, all interested employees at  
1271 participating facilities who provide diabetes care as part of their regular job duties will be eligible to

1272 participate as group leaders. Prior to training in Phase 2, we will consent and enroll the staff members  
1273 as research subjects identified during Phase 1. Group leaders and individual session providers will be  
1274 consented as research subjects specifically to collect implementation data on the EPIC intervention.  
1275 We expect to enroll 2-4 group leaders at each facility and 3-6 individual session providers at each  
1276 facility, for a maximum total of 40 subjects.

1277 **5.2.B. Patients' eligibility criteria.** Inclusion criteria: Using the Corporate Data Warehouse, we  
1278 will identify active patients at participating facilities meeting the study inclusion criteria: 1) ICD-9-CM  
1279 codes indicating diabetes, and 2) average HbA1c level  $\geq$  8% in the prior 6 months. We will not use  
1280 preparatory to research data. We will conduct a data search under approved waivers to identify eligible  
1281 patients. Exclusion criteria: We will use a medical record review to exclude potential participants with  
1282 the following clinical conditions that would render participation in a group clinic inappropriate: 1)  
1283 metastatic cancer or receiving hospice care, 2) limited life expectancy (as identified using a validated  
1284 algorithm developed in our prior work [see Attachment 1]),<sup>47</sup> 3) clinician recommendations to not titrate  
1285 therapy due to prior history of significant hypoglycemic events, 4) age <18 years, 5) active bipolar or  
1286 psychotic disorder, 6) documented active substance abuse, or 7) documented dementia. We estimate  
1287 that 20% of records will be excluded at chart review, resulting in approximately 3,020 letters sent to  
1288 Veterans. We will exclude participants at the time of screening who report to study staff that they 8)  
1289 have substantial hearing or vision loss, such that participation with the materials and group exercises  
1290 would not be possible, 9) cannot attend bi-weekly group clinic sessions due to transportation or  
1291 availability barriers, 10) have significant cognitive impairment (three or more errors on an established  
1292 six-item screening exam),<sup>63</sup> 11) have active substance-abuse disorders, or 12) are not comfortable  
1293 discussing their health and health care in a peer-group setting.

1294 Patients will be secondarily excluded if their HbA1C level falls below 7.5% at baseline. Patients  
1295 whose baseline levels fall below 7.5% may have limited ability for meaningful HbA1c change without  
1296 significant concerns for hypoglycemia.

1297 We will notify all participants identified as having uncontrolled diabetes but who do not meet the final  
1298 eligibility criteria (i.e., whose HbA1c drops below 7.5% at baseline) of their results. A note will be placed  
1299 in their medical record indicating this finding and they will be withdrawn from the research.

1300 **5.2.B.i. Identification of Patient- Participants and Recruitment Strategies.**

- 1301 1) Identify potentially eligible patient-participants in VISN 12 and Houston using data from the  
1302 Corporate Data Warehouse. To ensure accurate ascertainment of diabetes diagnosis, we will  
1303 identify patients with at least 2 outpatient or 1 inpatient ICD-9 code for diabetes mellitus. We will  
1304 extract HbA1c values from the prior 6 months. Patients with mean HbA1c  $\geq$  8.0% will be eligible for  
1305 Step 2.
- 1306 2) We will perform a standardized medical-record review to verify the diagnosis of diabetes and  
1307 evidence of any exclusion criteria. We will use a step-wise approach to the medical-record review,  
1308 adapted from our prior work, in blocks of 100 patients. Patient blocks will be organized by PACT  
1309 team. We will send opt-out letters (Attachment 15) to patients that remain eligible for study  
1310 participation. To ensure timely responses to patients and realistic work load, opt-out letters will not  
1311 be sent until we have attempted to contact 3/4ths of the prior block sample.
- 1312 3) We will then recruit all potentially eligible patients via an opt-out letter sent on behalf of the PACT  
1313 team mailed to their home address. Letters written at a sixth-grade reading level will direct patients  
1314 to call an opt-out number if they do not wish to be contacted about the study. A toll-free telephone  
1315 number answered by voice mail will be available for those with questions or who want to leave an  
1316 opt-out message. Unless the patient requests that he/she not be contacted, research personnel will  
1317 contact the patient after ten days or after the first telephone response from the same batch of  
1318 letters is received, whichever comes sooner. This protocol was previously approved by VA  
1319 Institutional Review Boards.

- 1320 4) We will then call potential subjects to introduce the study objectives and procedures and to obtain  
1321 verbal consent to administer a screening protocol. All potential participants who express interest in  
1322 the study and who do not meet the exclusion criteria will be invited to a group introductory meeting.  
1323 Time permitting, a letter detailing the date, time and location of the introductory meeting will be  
1324 mailed to the patient (Attachment 16). Research staff will provide a reminder call to invited patients  
1325 before the introductory meeting to ensure adequate group numbers and to answer any remaining  
1326 questions or concerns in a private conversation.
- 1327 5) The full informed consent process will be performed at the introductory meeting. Following consent,  
1328 the baseline paper surveys will be completed by participants.
- 1329 6) Baseline HbA1c lab draws will be ordered for immediately following the introductory meeting. If the  
1330 values for the baseline HbA1c level fall below 7.5%, patients will no longer be eligible for  
1331 randomization and will be withdrawn. Patients who still meet eligibility criteria (i.e., their HbA1c level  
1332 did not drop below 7.5% at baseline) will be randomized in the study.
- 1333 7) We will then randomize eligible consented participants to either the EPIC or EUC arm. Staff  
1334 members will inform participants by phone to which arm they have been assigned. During this call,  
1335 research staff will also verbally collect information on activation, health literacy and prior exposure  
1336 to related diabetes treatment (e.g. diabetes education).

#### 1337

#### 1338

#### 1339 **B.2.B. ii.. Patient-participant Compensation.**

1340 Participants will receive \$25 after the completion of each assessment, for a total of \$75 if the patient  
1341 completes all assessments.

#### 1342 **5.3 Informed Consent Procedures**

1343 To address the potential risks to participation and utilize data for the purpose of creating generalizable  
1344 knowledge, we obtained informed consent for all participants in Phase 1. In Phase 2, we will consent  
1345 both staff participants (group leaders and individual session providers) and patient-participants.  
1346 Study participants will be recruited for the study in collaboration with VISN 12 and Houston-based and  
1347 facility-level PACT leadership. We will use two recruitment approaches corresponding to our two  
1348 subject populations.

#### 1349

#### 1350 **5.3.A. Staff participants.**

1351 Prior to training, local research staff will consent all staff-participants (group leaders and individual  
1352 session providers) using a written consent form for participation in Phase 2 All staff participants will be  
1353 given an opportunity ask and have questions answered before agreeing to participate. The voluntary  
1354 nature of the research will be clearly stated, including specific provisions that job status will be  
1355 unaffected by the decision to participate. The confidential nature of the research will also be  
1356 emphasized. Research data, including fidelity measures, will not be shared with supervisors or anyone  
1357 outside the research team. All data generated by the research will be de-identified at publication.

#### 1358

#### 1359 **5.3.B. Patient-Participants.**

#### 1360

1361 Patient-participants will be identified using the structured recruitment protocol (**§5.2.B.i.**). Eligible  
1362 patients who do not opt out of study participation will be contacted by study personnel to introduce the  
1363 study objectives/procedures, and to obtain verbal consent to administer a screening protocol. Research  
1364 staff conducting the telephone screening will give the patient an opportunity to ask and engage in a  
1365 discussion on the merits of participation. If the initial screen indicates the patient may be interested  
1366 and eligible for the study, the patient will be invited to attend a face-to-face introductory meeting, where  
1367 a written consent to participate in the study will be offered. The patient will be encouraged to discuss  
1368 participation with family and/or friends before the introductory meeting. The full consent process will be  
1369 undertaken at the introductory meeting. Patients will be given another opportunity to ask and have

1370 questions answered. Attendance at the introductory meeting will not require participation in the study.  
1371 Patients will be free to leave the introductory meeting without enrolling in the research. Patients may  
1372 also take the unsigned informed consent document home with them for further consideration (but  
1373 should they return with a signed consent form desiring to participate, baseline data collection may be  
1374 delayed depending on the availability of an EPIC group). After all questions have been addressed,  
1375 patients will have the option to sign the informed consent document at the meeting.

1376  
1377 Eligible patients will also be notified that they may be asked to sign form 10-3203 in the future to allow  
1378 for voice recordings of a group session for the purpose of conducting fidelity assessment. Form 10-  
1379 3203 will be presented to subjects at a later date when the need for a fidelity assessment is certain.  
1380 Consent to voice recording will not be required to participate in the EPIC intervention. Should a subject  
1381 not agree, the group session will not be recorded.

1382  
1383

## 1384 **5.4 Inclusion/Exclusion Criteria**

### 1385 **5.4.A. Staff Participants**

1386 Inclusion criteria: We will recruit VA staff who regularly provide diabetes care as group leaders  
1387 and/or individual session providers.

1388 Exclusion criteria: We will exclude staff who: 1) do not have a VA appointment, and 2) do not  
1389 regularly provide diabetes-related care.

### 1390 **5.4.B. Patient Participants**

1391 Inclusion criteria: Using the Corporate Data Warehouse, we will identify diabetic VISN 12 and  
1392 Houston-based patients meeting the study inclusion criteria: 1) ICD-9-CM codes indicating diabetes  
1393 and 2) average HbA1c level  $\geq$  8% in the prior 6 months.

1394 Exclusion criteria: We will use a medical record review to exclude potential participants with the  
1395 following clinical conditions that would render participation in a group clinic inappropriate: 1) metastatic  
1396 cancer or receiving hospice care, 2) limited life expectancy (as identified using a validated algorithm  
1397 developed in our prior work [see Attachment 1]),<sup>47</sup> 3) clinician recommendations to not titrate therapy  
1398 due to prior history of significant hypoglycemic events, 4) age <18 years, 5) active bipolar or psychotic  
1399 disorder, 6) documented active substance abuse, or 7) documented dementia.

1400 We will exclude participants at the time of screening who report to study staff that they 8) have  
1401 substantial hearing or vision loss, such that participation with the materials and group exercises would  
1402 not be possible, 9) cannot attend bi-weekly group clinic sessions due to transportation or availability  
1403 barriers, 10) have significant cognitive impairment (three or more errors on an established six-item  
1404 screening exam),<sup>63</sup> 11) have active substance-abuse disorders, or 12) are not comfortable discussing  
1405 their health and health care in a peer-group setting.

1406 Patients will be secondarily excluded if their HbA1C level falls below 7.5% at baseline. Patients  
1407 whose baseline levels fall below 7.5% may have limited ability for meaningful HbA1c change without  
1408 significant concerns for hypoglycemia. We will notify all participants identified as having uncontrolled  
1409 diabetes but who do not meet the final eligibility criteria (i.e., whose HbA1c drops below 7.5% at  
1410 baseline) of their results. A note will be placed in their medical record indicating this finding and they  
1411 will be withdrawn from the research.

## 1412 **5.5 Study Evaluations**

1413

1414 **5.5.A. Summative Evaluation of Implementation**

1415 We will conduct a summative evaluation of EPIC implementation after completing study Phase  
1416 2. We will characterize successful implementation along three (dependent) variables related to  
1417 elements of the RE-AIM framework (reach, adoption, and implementation). The aims of Phase 2 will  
1418 address the remaining two elements of RE-AIM (effectiveness and maintenance). We will evaluate RE-  
1419 AIM along the measurement model described in Table 5 below.

1420 **5.5.A.i. RE-AIM Measures for the Summative Evaluation.** We will assess reach by comparing  
1421 the characteristics of enrolled study participants to those of all eligible patients participating. We will  
1422 evaluate adoption among PACTs at the facility level by evaluating PACT team-level characteristics that  
1423 differ among those with members who agree to participate versus others in a given facility. We will  
1424 also calculate the total number of personalized goal-setting sessions that occur following a scheduled  
1425 EPIC group session divided by the total number of EPIC group sessions patient-participants attended.  
1426 Finally, we will collect descriptive information about adoption such as frequency and percentage of  
1427 different types of professional disciplines of PACT members who participate in the personalized goal-  
1428 setting. For implementation, we will evaluate the proportion of group sessions attended per patient,  
1429 with the total possible number of group  
1430 sessions (i.e., six) as the denominator and the proportion of individual sessions attended per

**Table 5. RE-AIM Elements and Corresponding Measures**

| RE-AIM Elements (Phase 2)                                                                                                                                                                                                     | Proposal's Corresponding Measures                                                                                                                                                                                                                                                                                                                                                                                                                                                                                                                                                                                                                                                                                                           |
|-------------------------------------------------------------------------------------------------------------------------------------------------------------------------------------------------------------------------------|---------------------------------------------------------------------------------------------------------------------------------------------------------------------------------------------------------------------------------------------------------------------------------------------------------------------------------------------------------------------------------------------------------------------------------------------------------------------------------------------------------------------------------------------------------------------------------------------------------------------------------------------------------------------------------------------------------------------------------------------|
| <b>Reach:</b> Representativeness of patients who are willing to participate in the intervention                                                                                                                               | Characteristics of enrolled study participants from a given PACT patient panel compared to those of all PACT patients meeting eligibility criteria from that panel                                                                                                                                                                                                                                                                                                                                                                                                                                                                                                                                                                          |
| <b>Effectiveness:</b> Intervention's impact on important outcomes, including negative effects like diabetes distress                                                                                                          | Differences in HbA1c and DDS between EPIC and EUC study arms at 4 months (post-intervention)                                                                                                                                                                                                                                                                                                                                                                                                                                                                                                                                                                                                                                                |
| <b>Adoption:</b> Representativeness of settings & intervention agents willing to initiate a program <u>and their actual use of program or intervention components</u>                                                         | 1) Characteristics of PACT teams with participating members<br>2) Timing and frequency of one-on-one sessions following each group sessions                                                                                                                                                                                                                                                                                                                                                                                                                                                                                                                                                                                                 |
| <b>Implementation:</b> The intervention agents' fidelity to the various elements of an intervention's protocol; patients' use of the intervention strategies; <u>and the costs and cost-effectiveness of the intervention</u> | 1) Proportion of group sessions attended (out of six) for each enrolled patient<br>2) Proportion of individual sessions attended (out of six) for each enrolled patient<br>3) Objective ratings of individual session providers' fidelity to the collaborative goal-setting methodology using a structured fidelity rating process completed by a behavioral coaching expert on the study team<br>4) Patients' perceptions of goal-setting engagement by providers in both the intervention and EUC arms<br>5) Objective ratings of goal and action plan quality using our validated GET-D tool by trained research staff blinded to random assignment<br>6) <u>Cost-utilization and cost-effectiveness of EPIC compared with EUC arms.</u> |
| <b>Maintenance:</b> Long-term effects of a program on outcomes 6 or more months after the most recent intervention contact                                                                                                    | Differences in HbA1c and DDS between EPIC and EUC study arms to measure intervention persistence at 10 months                                                                                                                                                                                                                                                                                                                                                                                                                                                                                                                                                                                                                               |

1431 patient (i.e., 0-6) as the numerator. We will also examine fidelity ratings of all VA staff

1432 trained to lead the EPIC group sessions and those trained as individual session providers, who  
1433 conduct personalized, collaborative goal-setting; these ratings will be performed after training by a  
1434 behavioral coaching expert on the study team. The study team will then measure patient-participants'  
1435 self-reported ratings of how much their group leader and individual session provider(s) engaged them  
1436 in goal-setting using a validated measure,<sup>61; 62</sup> and objective ratings of goal and action plan quality  
1437 using our previously validated rating GET-D tool.<sup>48</sup> We will assess cost-effectiveness of this study from  
1438 a perspective of the VA health care system using a comprehensive cost-based database system. We  
1439 will use a micro-costing approach to track and record all expenses related to the EPIC and EUC  
1440 components and non-research related resource consumptions such as the educational materials and  
1441 staff time spent on both study arms. We will retrieve medical utilization and cost data from the National  
1442 Patient Care Database and the Decision Support System. We have experience working with each of  
1443 these data sources in our prior HSR&D funded work. The National Patient Care Database includes  
1444 outpatient and inpatient clinical, demographic, and utilization data (e.g., patient age, race, diagnosis  
1445 and procedure codes, clinic location where care is provided, and the provider of care). The Decision  
1446 Support System, a managerial cost accounting system, produces National Data Extracts that provide  
1447 cost and utilization information for a range of health care activities, including laboratory, pharmacy,  
1448 radiology, outpatient services, and inpatient treating specialty units. Unit cost of personnel time will be  
1449 based upon the actual salary rate and fringe. Unit cost of other resources such as supplies and  
1450 facilities will be derived from the VA accounting system. Total costs for each patient will be the summed  
1451 products of quantities of resources used multiplied by the unit cost for those resources. All costs will be  
1452 adjusted to constant US dollars in 2016. For cost-effectiveness, we will use two measures: 1) number  
1453 of study patients with clinically significant improvements in HbA1c; and 2) number of quality adjusted  
1454 life-years using the validated EQ-5D instrument to derive health utility weights.<sup>63</sup> The utility score  
1455 (weight) of each individual patient at each observational interval over the trial period (baseline to 4  
1456 months to 10 months) will be calculated according to the scoring algorithms provided by the EQ-5D  
1457 developers.<sup>64</sup> The primary end-point measures of cost-effectiveness are: 1) the incremental cost per  
1458 additional number of study patients whose HbA1C are significantly improved and 2) the incremental  
1459 cost per additional quality adjusted life-year gained, of the intervention relative to the control group.

1460

1461

1462 **5.5.B. Data Collection Strategy § 5.1.H.**

1463 **5.5.C. Study Variables § 5.1.I.**

1464

1465

1466 **5.6 Data Analysis**

1467 **5.6.A. Sample Size Calculation/Sample size determination**

1468 Sample size is calculated according to the estimated intervention effect size at post-  
1469 intervention. We then estimate power to detect treatment effects at the post-maintenance (10-month)  
1470 follow-up as well as power to detect treatment differences in linear change across the three time points  
1471 for a 3-level cluster-randomized trial with repeated assessments. We will adjust models for baseline  
1472 covariates of study patients. All tests will be two-sided with an alpha of 0.05. In our recent RCT,  
1473 differences in HbA1c change between EPIC versus enhanced group education indicated medium  
1474 treatment effects at post-treatment and at 1-year (Cohen's d = 0.48 and 0.42, respectively). A similar  
1475 trial<sup>65</sup> revealed a treatment difference between a glucose self-monitoring protocol and an active control  
1476 group in DDS scores that correspond to large effects of treatment at 1-year (all pre-post ds > 0.80). To  
1477 capture treatment effects for both clinical and patient centered outcomes in this implementation trial, a  
1478 conservative small-to-medium effect size of d = 0.40 (which is 16.67% smaller than the effect found for



1479 HbA1c in the prior trial) was used to calculate sample size. Assuming no intra-class correlation (ICC)  
1480 within PACTs, 100 patients in each treatment arm (i.e., EPIC and EUC) will allow for 80% power to  
1481 detect small-to-medium effects and 98% power to detect medium effects ( $d = 0.50$ ). To account for the  
1482 dependency among patients within a PACT, the Design Effect (Deff) was applied, following the  
1483 approach of Schnurr et al.<sup>66</sup> The sample size was inflated using the formula,  $Deff = 1 + (n-1)\rho$ , where  $n$   
1484 is the average number of patients per PACT and  $\rho$  is the ICC for PACTs. In our preliminary work, we  
1485 identified an ICC for PACTs of 0.0183, an average of 27 eligible patients per PACT, and expect that an  
1486 average of 12 patients per PACT will participate, which yields  $Deff = 1 + (12-1) * 0.0183 = 1.2013$ .  
1487 Applying this adjustment, the minimum number of patients in the clustered design is  $100 \times 1.2013 =$   
1488 120 in each treatment group. Further adjusting for a maximum of 15% attrition, 142 patients will be  
1489 recruited for each treatment group (total  $N = 284$ ). Therefore, the minimum number of PACTs to be  
1490 sampled for this nested analysis is technically 11.8, (i.e.,  $142/12$ ), which will be rounded up to 24  
1491 PACTS. This is highly feasible, representing just 32.5% of the total number of PACTs (75) at all study  
1492 sites. Treatment group effect sizes as small as  $d = .40$  can be detected with 80% power at 1-year  
1493 given a total of 284 patients (an average of approximately 12 patients randomized to either EPIC or  
1494 EUC from within 24 PACTs sampled), even after accounting for maximum attrition and estimated  
1495 dependency within PACTs. A sample size of 284 participants is adequate for repeated measures  
1496 analyses as well. Optimal design software estimated power to detect treatment group differences in  
1497 linear change across all three assessments.<sup>67</sup> Prior data indicated a main effect of treatment (EPIC  
1498 versus enhanced group education) for linear change in HbA1c of 0.20, and between – and within –  
1499 PACT variance in linear change of 0.018 and 0.206, respectively. These values indicate a small-to-  
1500 medium between-groups effect size of 0.42. A total of 284 participants allows for 80% power to detect a  
1501 slightly larger effect size ( $\delta = .53$ ) for repeated measures analyses of linear change over time.  
1502 Furthermore, there is 98% power to detect a medium effect size of  $\delta = .75$ .

#### 1503 **5.6.B. Data Collection Strategy § 5.1.H.**

#### 1504 **5.6.C. Data Analysis**

1505 Specific Aim 1: H1 Analysis (Summative Evaluation). We will first calculate descriptive statistics such  
1506 as frequencies, proportions, means, and standard deviations for reach, adoption, and implementation  
1507 measures for the overall sample (i.e., VISN 12 and Houston) and for each specific facility. We will  
1508 determine cost-utilization of resources within both study arms and the incremental cost-effectiveness  
1509 ratio (ICER), which is the difference in the estimated mean cost between the intervention and control  
1510 groups divided by the difference in the estimated mean effectiveness between the two study arms. The  
1511 base-case will be the control group. We will estimate two ICERs: 1) the incremental cost per additional  
1512 number of study patients with clinically significant HbA1C reductions, and 2) the incremental cost per  
1513 additional quality adjusted life-year gained, of the intervention arm over the study period respectively.  
1514 We will calculate ICER as a ratio of the difference in the estimated mean total cost between the EPIC  
1515 and EUC groups divided by the difference in the estimated mean number of patients whose HbA1c  
1516 levels are significantly improved between the two study arms. Similarly, we will calculate ICER of the  
1517 intervention in terms of the quality adjusted life-year as a ratio of the difference in the estimated mean  
1518 total cost between the intervention and control groups divided by the difference in the estimated mean  
1519 total number of quality adjusted life-year between the two study arms. We will use a commonly used  
1520 threshold, \$50,000 per quality adjusted life-year gained, as a reference point to determine if the  
1521 intervention is cost effective.

1522 Because cost data are typically right-skewed and also subject to bias due to death and/or  
1523 attrition, we will directly model the logarithm of costs using generalized linear modeling with a  
1524 logarithmic link function and inverse probability weight to adjust for these potential biases. We will  
1525 control any baseline imbalance between groups with respect to the cluster and study population  
1526 characteristics in the calculations of expected mean cost and effectiveness. The estimated value of

1527 cost and quality adjusted life-year will not be discounted given a relatively short follow-up period in the  
1528 study.

1529 We will conduct exploratory analyses to examine associations between implementation measures (RE-  
1530 AIM elements in table 5) and study outcomes following the conclusion of Phase 2. For example, for all  
1531 eligible patients, within each PACT demographic characteristics will be compared between enrolled  
1532 and non-enrolled patients using chi-square tests and independent samples t-tests. Fisher's Exact Test  
1533 and the Wilcoxon Mann-Whitney tests will be used where appropriate. An index of reach  
1534 representativeness will be calculated for each PACT which will then be correlated with post-intervention  
1535 outcomes, controlling for respective baseline values. Similarly, for all PACTs sampled, PACT  
1536 characteristics (e.g., panel size) will be compared between sampled and non-sampled PACTs using  
1537 chi-square tests and independent samples t-tests. An index of adoption representativeness will be  
1538 calculated for each PACT which will then be correlated with post-intervention outcomes, controlling for  
1539 respective baseline values. Additionally, for patients receiving the EPIC intervention within each PACT,  
1540 post-intervention HbA1c will be separately regressed on 1) the proportion of group sessions attended,  
1541 2) the proportion of individual sessions attended, and 3) baseline objective ratings of the group leader's  
1542 fidelity. These models will control for baseline HbA1c and will be conducted using ANCOVA methods.  
1543 Predictors that are significant at  $p < 0.25$  will be included in a multiple linear regression to examine both  
1544 collective and unique predictors of post-intervention HbA1c levels (once again controlling for baseline  
1545 HbA1c). Similar univariate and multivariate models will be formed to predict post-intervention DDS.

1546 Specific Aim 2: The distributional nature of all variables will be assessed, and nonparametric tests (e.g.,  
1547 Fisher's Exact Test; Mann-Whitney test), data transformations (e.g., log linear), or other alternate  
1548 methods (e.g., weighted least squares regressions) will be conducted where appropriate. First, we will  
1549 compare baseline demographic, clinical, and patient-centered variables (including medication use)  
1550 between EPIC and EUC with chi-square and independent samples t-tests. Variables with p-values  $<$   
1551  $0.25$  will be included as control variables or propensity scores in subsequent models<sup>101</sup>. We will then  
1552 compare baseline demographic, clinical, and patient-centered variables between those who complete  
1553 the study and those who do not using chi-square and independent samples t-tests. Outcome analyses  
1554 at both post-intervention and post-maintenance will be intention-to-treat and will use the multiple  
1555 imputation procedures Proc MI and MINANALYZE in SAS Version 9.3 to estimate missing  
1556 observations<sup>101</sup>. We will evaluate the degree of dependency between patients within a given group  
1557 session, between patients in a given PACT, and between PACTs within each of the five sites (by  
1558 examining Intra Class Coefficients). It is likely that significant dependency will exist, and if so, we will  
1559 accordingly take these into account in analyses (i.e., patients will be nested within PACTs which will in  
1560 turn be nested within sites). Random regression methods using SAS Proc Mixed will be employed to  
1561 account for clustering of data.

1562 5.6.C.i. H2 Analyses (Effectiveness) We will employ Analysis of Covariance (ANCOVA) to  
1563 examine treatment differences in outcomes immediately post-intervention (at 4 months). We will  
1564 conduct two models: one with HbA1c at post-intervention as the outcome and one with DDS at post-  
1565 intervention as the outcome. Models will include treatment group (i.e., EPIC versus EUC) as a  
1566 predictor and respective HbA1c and DDS baseline scores and any demographic, clinical, or patient-  
1567 centered variables that differed between the study arms at baseline as covariates. We will calculate  
1568 treatment effect sizes immediately post-intervention.

1569 5.6.C.ii. H3 Analyses (Maintenance) Analyses for examination of maintenance of treatment  
1570 effects will be similar to those for immediate treatment effects post-intervention. We will again employ  
1571 ANCOVA to examine treatment differences in outcomes at the post-maintenance (10-month)  
1572 assessment. We will conduct two models: one with HbA1c at 10-months as the outcome and one with  
1573 DDS at 10-months as the outcome. Models will include treatment group (EPIC versus EUC) as a  
1574 predictor and respective HbA1c and DDS post-intervention scores and any demographic, clinical, or

1575 patient-centered variables that differed between the study arms at baseline as covariates. We will  
1576 calculate treatment effect sizes at the 10-month assessment.

1577 5.6.C.iii. Exploratory Analyses (Implementation and Effectiveness) We will use a mixed-model  
1578 approach to conduct separate repeated-measures analyses for HbA1c and DDS simultaneously using  
1579 all three assessment time points. We will employ growth curve analyses using SAS Proc Mixed to  
1580 examine overall group differences in improvements or decrements in outcomes over the year,  
1581 maximize participant data, and account for dependency between patients within a given group session,  
1582 PACT, and site. Conditional models will contain fixed terms for the intercept, treatment (EPIC or EUC),  
1583 assessment time period, treatment by time period interaction, and previously identified variables that  
1584 differ between treatment groups. Modeled random effects will include between-patient variation in  
1585 baseline scores (i.e., the intercept where baseline assessments are scored 0) and variation in the  
1586 slopes for time. With three assessments, the focus will initially be on linear patterns of change,  
1587 although we will evaluate the relative fit of a quadratic pattern of change using the likelihood ratio test.  
1588 These analyses will allow us to examine the immediate impact of treatment at post-intervention as well  
1589 as retention, improvement, or decay in outcomes post-maintenance period. The treatment effect will  
1590 assess differences between the two groups at baseline, the fixed effect of time will measure the  
1591 average change over time in the outcome (collapsing across the two treatment groups), and the time  
1592 by treatment interaction will indicate whether change over time (in slopes) differs between EPIC and  
1593 EUC.

1594 Several variables will be examined as separate mediators of the relationship between  
1595 intervention group (EPIC versus EUC) and post-intervention outcome variables: 1) patients'  
1596 perceptions of goal-setting engagement by the designated PACT member (CSQ), 2) objective ratings  
1597 of goal and action plan quality (GET-D), 3) self-efficacy for diabetes self-management, 4) diabetes self-  
1598 management adherence, and 5) mediation adherence. For each mediator, we will conduct three  
1599 separate models to test for mediation between intervention group and each outcome: 1) the first model  
1600 will regress post-intervention HbA1c levels on treatment group and baseline HbA1c levels, 2) the  
1601 second model will regress the mediator on treatment group and baseline HbA1c levels, 3) the third  
1602 model will regress post-intervention HbA1c levels on treatment group, baseline HbA1c levels, and the  
1603 mediator. Parallel analyses will be conducted to predict change in DDS. We will use bootstrapping  
1604 methods to calculate the unstandardized estimate of the indirect effects as well as unbiased confidence  
1605 intervals.<sup>99</sup> Significance will be established if the 95% confidence interval of the indirect effect does not  
1606 include zero. Bootstrapped analyses will be performed using MPlus Version 6.<sup>100</sup>

1607

#### 1608 **5.6.D Data Analysis Logistics**

1609 Phase 2: VA administrative data will be accessed and stored on the VA's centralized and secure  
1610 Information and Computing Infrastructure (VINCI). VINCI is a major informatics initiative of the  
1611 Department of Veterans Affairs (VA) that provides a secure, central analytic platform for performing  
1612 research and supporting clinical operations activities. It is a partnership between the VA Office of  
1613 Information Technology (OI&T) and the Veterans Health Administration Office of Research and  
1614 Development (VHA ORD). VINCI includes a cluster of servers for securely hosting suites of databases  
1615 integrated from select national VA data sources. VINCI servers for data, applications, and virtual  
1616 sessions are physically located at the VA Austin Information Technology Center (AIRC), located in  
1617 Austin, Texas. This secure data storage enclave has multiple layers of security and disaster recovery to  
1618 prevent data loss. To ensure the protection of Veteran data, VINCI maintains compliance with the  
1619 guidelines set forth by Veterans Health Administration (VHA) Handbook 1200.12. Accesses to VINCI  
1620 resources are approved in accordance with the requirements of National Data Systems (NDS), "VHA  
1621 Handbook 1200.12, Use of Data and Data Repositories in VHA Research", and all other applicable VA  
1622 and VHA policies and regulations. Study data stored on VINCI servers are located at the Austin  
1623 Information Technology Center, 1615 Woodward St., Austin, TX 78772-0001.

1624

1625 Data necessary for recruitment will be imported into a study database stored on the local drive. Recent  
1626 experience has shown that, at the moment on the VINCI platform, access and computing is very slow  
1627 compared to the local servers. Storing the database locally will provide broader, faster access to  
1628 research staff who are delegated to use the database. Accordingly, we will house the MS Access  
1629 database for recruitment and data collection on the local server. As MS Access is not feasible to use on  
1630 VINCI, research staff will prepare a limited data set which meets HIPAA standards which can then be  
1631 downloaded via secure FTP from VINCI to a local VA secure server located at the Houston VA HSR&D  
1632 IQuEST. This limited data set will then be imported to the MS Access database stored on the Houston  
1633 VA HSR&D IQuEST secure server. Preparation of the limited data set to be downloaded to the  
1634 Houston VA IQuEST shared drive will occur only within the VINCI secure platform. Copies of other data  
1635 sources will be uploaded to the Project folder within VINCI from the location of current storage after  
1636 appropriate approvals with the data custodians are established.

1637

1638 Data analyses will take place with a number of statistical programs including SAS, and potentially  
1639 Microsoft SQL Server (T-SQL), Stata, and/or R. All these resources are available to research staff on  
1640 the VINCI secure computing platform, reducing the need for large data transfers to local VA secure  
1641 servers. However, one resource that is lacking at the moment on the VINCI platform is the software  
1642 which will be used to statistically analyze the constructed cohort files. Mplus is a versatile and  
1643 commonly used structural equation modeling software application which has been approved and tested  
1644 by VA OI&T for use within the VA. This software will be used to complete the final inferential statistical  
1645 analyses in this protocol. Current software applications on the VINCI system (e.g., SAS, Stata, R) do  
1646 not yet contain procedures/packages which can accommodate the inferential statistical analyses  
1647 outlined in this protocol. As Mplus is not available on VINCI yet, research staff will prepare a limited  
1648 data set which meets HIPAA standards which can then be downloaded via secure FTP from VINCI to a  
1649 local VA secure server located at the Houston VA HSR&D IQuEST. This limited data set will then be  
1650 analyzed from the Houston VA HSR&D IQuEST secure server.

1651 Preparation of the limited data set to be downloaded to the Houston VA IQuEST shared drive will occur  
1652 only within the VINCI secure platform. Analyses with VA data that do not involve the structural equation  
1653 models described in this protocol will be completed in the VINCI workspace and secure computing  
1654 resources provided by VINCI staff (e.g., SAS, MS SQL Server, Stata, or R). However, once the cohort  
1655 files have been constructed and are suitable for structural equation modeling, preparation of the limited  
1656 data set will then involve removing all patient identifiers. For this protocol, patient identifiers include the  
1657 VA's scrambled SSN (SCRSSN), real SSN, dates, and zip codes. The limited data set will then be  
1658 stripped of these patient identifiers in the following process before transfer from the VA's VINCI  
1659 platform to the Houston IQuEST local secure server:

1660

- 1661 1) Real SSN will be completely deleted immediately from the limited data set.
- 1662 2) PatientSID and PatientICN variables from CDW will be completely deleted from the limited dataset,
- 1663 3) SCRSSN will first be sorted randomly in the dataset and then encoded to anonymous numbering  
1664 (i.e., 1, 2, 3, 4...N) unique to this limited data set. This procedure anonymizes the records with respect  
1665 to individual VA patient identification, but preserves the essential nesting structure of multiple non-  
1666 independent records nested within participant in the limited dataset. SCRSSN will then be completely  
1667 removed from the limited data set prior to download from VINCI FTP to the local Houston VA IQuEST  
1668 secure server.
- 1669 4) Similar to SCRSSN, dates will be encoded such that the same dates in the limited data set retain the  
1670 same ordering, but values will not be identified as dates. For example, SEP272013 might be coded as  
1671 74 with SEP282013 coded as a 75, and so on. This approach preserves the order and parametric  
1672 qualities of former date variables, but does not allow any identification of actual dates of care in the  
1673 limited data set. Actual date values in the entire limited data set will then be deleted prior to download  
1674 from VINCI FTP to the local Houston VA IQuEST secure server.

- 1675 5) As with the process of anonymizing SCRSSN and deleting this variable, zip codes will be encoded  
1676 such that the zip code variable will first be sorted randomly and then encoded to non-identifying  
1677 numbers unique to this limited dataset. For example, zip code 55555 might be coded as 1, 72468 might  
1678 be coded as 2, 56912 might be coded as 3, etcetera. This step will again be completed in VINCI prior  
1679 to secure FTP download to the Houston VA IQuEST's secure server. After encoding zip code, zip code  
1680 will be deleted from the limited dataset.
- 1681 6) Final checks that all identifying information has been removed from the dataset will be made, and  
1682 7) The limited data set will be transferred from VINCI to Houston VA's IQuEST secure server for  
1683 analysis with VA approved Mplus software (once again, as this software is not available on the VINCI  
1684 platform, but approved by VA OI&T).
- 1685 8) No means of linking VA data stored in the VINCI project workspace with values in the limited data  
1686 set will be available outside of VINCI.

1687  
1688 It is important to note that VINCI has an audit function built in such that review of FTP downloaded data  
1689 does not violate HIPAA or VA policies. The 8 step approach outlined above, along with this audit/data  
1690 download monitoring function that VINCI maintains will ensure that PII/PHI remain securely protected  
1691 and confidential.

1692 The primary person(s) processing and analyzing data will be the Houston Data Analyst(s). The  
1693 Houston-based investigators (Woodard, Naik, Amspoker, Arney, and Hundt) will assist with data  
1694 analysis when needed. Dr. Woodard will have primary responsibility for oversight of all data analysis  
1695 work.

1696

## 1697 **5.7 Withdrawal of Subjects**

### 1698 **5.7.A. Group Leaders and Individual Session Providers.**

1699

1700 **5.7.A.i. Investigator termination of subject participation:** The investigator does not  
1701 anticipate any circumstances under which subjects will be withdrawn from the research without their  
1702 consent.

1703

1704 **5.7.A.ii. Consequences of withdrawal:** If a participant decides to withdraw, there are no  
1705 foreseeable consequences. A replacement will need to be identified, consented and trained to  
1706 complete study enrollment.

1707

1708 **5.7.A.iii. Procedure for orderly termination of participation by the subject:** The subject  
1709 must notify the investigator, or Research Coordinator, by telephone or written correspondence of their  
1710 desire to withdraw from the study. When possible, the subject will finish working with the current cohort  
1711 of subjects before terminating participation.

1712

### 1713 **5.7.B. Patient Participants**

1714

1715 **5.7.B.i. Investigator termination of subject participation:** The investigator does not  
1716 anticipate any circumstances under which subjects will be withdrawn from the research without their  
1717 consent unless the participant develops a condition on the exclusion criteria that will put them at risk.

1718

1719 **5.7.B.ii. Consequences of withdrawal:** If a participant decides to withdraw prior to the  
1720 completion of the baseline assessment, the only consequence to the subject would be not receiving  
1721 study compensation (because they would not have completed baseline assessment as required). If a  
1722 participant decides to withdraw at any point after baseline, there are no foreseeable consequences.

1723  
1724  
1725  
1726

**5.7.B.iii. Procedure for orderly termination of participation by the subject:** The subject must notify the investigator, or Research Coordinator, by telephone or written correspondence of their desire to withdraw from the study.

1727  
1728

1729 **6.0 Reporting**

1730 All unanticipated serious adverse events (U-SAEs) and unanticipated serious problems (UAPs) will be  
1731 reported to the VA Central IRB within five business days. U-SAEs will be reported to VA Central IRB  
1732 regardless of their relationship to the research. All protocol deviations, violations, and/or  
1733 noncompliance will be reported to the VA Central IRB within five business days of the reporting  
1734 individual becoming aware of the occurrence.

1735 Safety information, including SAEs, that will be collected:

1736 Occurrences of events resulting in a participants' death, life threatening experience, hospitalization,  
1737 prolonged hospitalization, or persistent or significant disability related to hypoglycemia will be defined  
1738 as a Serious Adverse Event and documented. Any occurrence of an event that results in the need for  
1739 medical or other interventions to prevent any of the above listed outcomes will be documented as well.  
1740 As such, any participants identified as having an immediate physical health issue will be referred to  
1741 care as appropriate.

1742 Frequency/methods of safety-related data collection:

1743 Collection of safety information will commence when the first participant is enrolled in the study; this is  
1744 anticipated to occur during Spring 2015. Safety information may be collected either 1) during baseline  
1745 and follow up assessments, 2) during EPIC sessions, or 3) during telephone contacts with participants  
1746 made for purposes of scheduling assessments and/or treatment sessions. Also, the Research  
1747 Coordinator or RA will periodically contact patients to schedule study-related safety appointments. The  
1748 participants or other informants may report information related to their safety at those times.

1749 Conditions that would trigger an immediate suspension of the research:

1750 This intervention will compare a brief, structured goal-setting intervention with usual care practices in  
1751 VA facilities. The active treatment (EPIC) utilizes an empirically-supported theory to enhance patients'  
1752 self-management of diabetes. No invasive procedures or untested techniques will be used. As such,  
1753 this protocol is judged to be of low risk. We do not anticipate the occurrence of events that would  
1754 necessitate the immediate suspension of research because of 1) the low probability of adverse events  
1755 from the intervention in either arm of the study, 2) all participants will continue to receive usual care  
1756 services within the VA, and 3) treatment for any VA services will not be withheld from any participants.

1757 Specify procedures to determine when and how to notify individual participants or their health care  
1758 providers of findings that may affect the participant's health or welfare:

1759 The decision to contact a patient and/or their health care provider regarding patient welfare can be  
1760 made in two ways. First, the Project Coordinator or research staff will conduct routine checks on  
1761 participants' safety and well-being during baseline and follow up assessments. The study personnel will  
1762 notify the patient and/or their healthcare provider as necessary.

1763 Second, data and safety monitoring is expected to be conducted at both the local and national levels.  
1764 At the local level, the study PI (Woodard), site PIs (Damstra, Hertz, Ryan), co-investigators (Naik,  
1765 Amspoker, Hundt, Arney) will work with the study programmer and statistician to review data and safety  
1766 issues regularly during monthly investigator meetings or more immediately as needed. Data and safety  
1767 monitoring will occur for any identified adverse events as well as including a regular monitoring  
1768 schedule of participant longitudinal data. Any participants identified as having an immediate physical  
1769 health issue will be referred to care as appropriate. All participants, regardless of treatment, with a 20%  
1770 increase in symptoms (relative to baseline) will be called to ensure safety and encourage the  
1771 participant to obtain care if desired.

1772 At the national level, we anticipate participating in the VA's Data and Safety Monitoring Board (DSMB).  
1773 We will provide the national DSMB with comprehensive annual and semi-annual reports, as directed,  
1774 for formal independent review of study safety and recruitment practices.

1775

## 1776 **7.0 Privacy and Confidentiality**

### 1777 **7.0.A. Privacy and Confidentiality**

1778 To minimize the risk of unintentional disclosure of personal information, all electronic and paper data  
1779 collected for this study will be kept in secure storage. Access to data with individual identifiers will be  
1780 restricted. Data for all participants will be identified by study ID number only. Links between the study  
1781 ID and personal identifying information will be maintained separately. Neither the participant's name  
1782 nor any other identifying information will be connected to any information they provide. Extensive  
1783 measures are taken to maximize privacy and confidentiality of data, as described next. A Certificate of  
1784 Confidentiality will not be obtained.

1785

### 1786 **7.0.B. Data security protocols for Houston VA HSR&D IQuEST Computing Center users**

1787 All project staff is required to have undergone significant training on the protection of human subjects,  
1788 research methods and the importance of integrity in the research process. Houston VA HSR&D  
1789 IQuEST Computing Center also requires all project staff to review the Data Security Compliance  
1790 Agreement which describes the center's data security protocol. Each project staff member must sign an  
1791 acknowledgement that they have reviewed the policy and agree to follow the policy before accessing  
1792 data. The Houston VA HSR&D IQuEST Computing Center data security policy conforms to current VA  
1793 policies and has been reviewed and approved by the MEDVAMC Chief Information Officer, Information  
1794 Security Officer, and Privacy Officer.

1795

1796 No individual-specific data from the secondary data analyses will be released to anyone except the VA  
1797 research team members with data access privileges (**\$5.6.**). All findings will be presented as  
1798 aggregated results. No individual-specific data from the qualitative data interviews or data analysis will  
1799 be released to anyone except the approved qualitative interview study team members. All findings will  
1800 be presented as aggregated results.

1801

1802 The main risk of this project is unauthorized access to the patient data. We have a multi-layered  
1803 system in place to prevent unauthorized access to the data.

- 1804 1. The computer system at the Houston VA HSR&D IQuEST is behind the VA firewall. The  
1805 system servers are behind a locked door with access limited to IT personnel. During non-  
1806 business hours, the servers are behind 3 locked doors. IQuEST has restricted physical access  
1807 and is not a patient-care facility. The servers are backed up automatically each night.  
1808 2. The physical address of the servers is Houston VA Medical Center, HSR&D Center for  
1809 Innovation in Quality, Effectiveness and Safety, 2450 Holcombe Blvd, Suite 01Y, Houston, TX  
1810 77021, Room 166.  
1811 3. The computer server that this project will use for data analysis is configured to limit access.  
1812 Users must be logged on to the VA internal network to access the server.  
1813 4. All HSR&D IQuEST research projects that use confidential data have project-specific  
1814 directories configured so that project staffs are the only system users that can access the  
1815 directory.  
1816 5. The data files for this project will be encrypted and will reside in password-protected  
1817 electronic folders that will be maintained by the HSR&D IQuEST Computing Center in  
1818 accordance with all VA data security measures.  
1819 6. VA HSR&D IQuEST issues login accounts only to VA research staff who can demonstrate  
1820 need to use the secure server. The Principal Investigator must sign a Delegation of Authority  
1821 form for each study team member who is requesting access to the secure project directory. The  
1822 Delegation of Authority form must be approved by the HSR&D IQuEST Research Assurance  
1823 and Data Security (RADS) Coordinator, who will in turn submit a request to the center's IT  
1824 Manager to add the individual study team member to the approved access list for the project's  
1825 electronic directory.  
1826 7. Within 24 hours of an individual leaving the study team, the PI or the Research Coordinator  
1827 will submit a request to the IT Manager (with a copy to the RADS Coordinator) to remove the  
1828 individual from electronic access to the project directory on the VA server.  
1829 8. A "shared drive" will be established on the Houston VA HSR&D IQuEST secure server  
1830 behind the national VA firewall for the purpose of providing access to approved study team  
1831 members or investigators at other VA locations. Those individuals must be logged in to the VA  
1832 internal network to access the server.  
1833  
1834

1835 **7.0.C. Data security during transfer of data between VA facilities (data with Real SSNs and**  
1836 **Scrambled SSNs as identifiers)**  
1837

1838 This study, which involves analyses of databases, requires data transfers between the Houston VA  
1839 HSR&D IQuEST and other VA facilities which are pulling data for us on subjects in the VA cohort finder  
1840 file that we send to them (e.g., for CDW data from VINCI).  
1841

1842 Scrambled SSN will be used as the patient identifier for linkage with VA databases residing at other VA  
1843 facilities wherever possible; however, real SSN/names will be required for some finder files. Any  
1844 needed transfers of data between VA facilities will occur via one of the following VA-approved  
1845 mechanisms for secure transfer (in password-protected files encrypted with VA-approved standard of  
1846 encryption):

- 1847 1. Direct file transfer over VA server behind the national VA firewall.  
1848 2. Direct file transfer using SFTP (secure FTP) to move file from server at one VA to server at  
1849 another VA (this will require a VA data analyst at the recipient VA to remotely log onto the  
1850 Houston VA HSR&D secure server to download the data to his/her VA server, and vice versa).  
1851

1852 We will work with our Houston VA HSR&D IQuEST IT Manager and with the VA entity that serves as  
1853 the data owner (e.g., VINCI) to assure that our data transmission approach meets the most up-to-date  
1854 national and local VA standards.  
1855



1856 No data access will be provided to anyone outside the study team, except that a finder file of either  
1857 scrambled SSNs or Real SSNs of patients in our cohort (along with any other data elements necessary  
1858 for matching, including sex and date of birth) will be sent to the centralized VA repositories (e.g., VINCI)  
1859 so that they can pull necessary data elements for us. Only study staff that needs access to the data to  
1860 perform their research functions will have access to PHI. Paper data containing baseline patient-level  
1861 data will be stored securely within the office space of the local site investigator behind 2 locked doors.  
1862 Any temporary print-out copies of record-level data elements printed to facilitate inspection of the data  
1863 **will not** contain scrambled SSNs, Real SSNs, or provider identification numbers. Any data printouts  
1864 will be stored in a locked cabinet in a locked research room when not in use, and will be securely  
1865 shredded as soon as inspection is complete. Individual-level PHI will never be reported in any  
1866 presentation of the data; data will only be presented in aggregate. The data will be kept on secure,  
1867 password-protected VA servers.

1868  
1869 **7.0.D. Data destruction**

1870 We will maintain the data files and all datasets created from the data files on the local, secure server at  
1871 least as long as data analysis is ongoing, and for the period of time as required in the Record Control  
1872 Schedule (RCS) for VA research records per the VA directives regarding retention of study data. At this  
1873 time, VA research records do not have RCS – therefore all VA research records will be stored until  
1874 disposition instructions are approved by the National Archives and Records Administration are  
1875 published in VHA’s Records Control Schedule (RCS 10- -1). When it is time to destroy the data, we will  
1876 follow data disposition instructions approved by the RCS.

1877 **8.0 Communication Plan**

1878 **8.0.A. Plan for ensuring all required local site approvals are obtained and notifying the Director**  
1879 **of any facility where the research is being conducted but the facility is not engaged.**

1880 **8.0.A.i. Plan for engaged facilities:**

1881 Upon approval of the PI/SC application Form 108, each local site will submit VA Central IRB Form 104  
1882 (Local Site Investigator Application), which must be signed by the Local Site Investigator, his/her  
1883 supervisor, and the local site ACOS/R&D or Chief of Staff.

1884 Upon VA Central IRB approval of the Form 104 Local Site Investigator Application, the local site R&D  
1885 Committee must provide written approval for the research to be conducted at the local site before the  
1886 research begins.

1887 The Research Coordinator will maintain copies of the local site R&D Committee approvals in the main  
1888 site regulatory binder.

1889 Local site Investigators or their designated study team member Research Assistants (RAs) will  
1890 maintain copies of the main site approval, as well as the local site R&D Committee approvals in their  
1891 respective local site regulatory binders.

1892  
1893 **8.0.A.ii. Plan for non-engaged facilities:**

1894 Upon VA Central IRB approval of the PI/SC New Project Application, the Principal Investigator will  
1895 notify the VISN 12 sites, to submit a request for approval to conduct research on this study to the local  
1896 VA Facility Director and to the local site Research & Development Committee.

1897 This research study will not take place at any other facility not engaged in the research (i.e., without a  
1898 Local Site Investigator Project Application approval).

1899  
1900 **8.0.A.iii. Plan for notifying and obtaining local site approval of amendments and other**  
1901 **administrative changes:**

1902 Upon VA Central IRB approval of all PI/SC Amendments and Local Site Amendments (including  
1903 modifications to the protocol, the informed consent form, and the HIPAA authorization), the Research

1904 Coordinator will send an electronic copy of the approval and all attachments via email to the Local Site  
1905 Investigator to submit to the local site R&D Committee for approval.  
1906 The Research Coordinator will maintain copies of all local site R&D Committee approvals in the main  
1907 site study binder  
1908 The local site Investigator or local site RA will maintain copies of their respective local site R&D  
1909 Committee approvals in their local site study binder.

1910  
1911 **8.0.B. Plan for keeping all engaged sites informed of changes to the protocol, informed consent,**  
1912 **and HIPAA authorization**  
1913 See **8.0.A.iii**

1914  
1915 **8.0.B.i. Regular meetings and conference calls** The PI will lead regular conference calls and  
1916 meetings that will include discussions of changes to the protocol, informed consent process and the  
1917 HIPAA authorization. Study team members will be notified through these conference calls and  
1918 meetings of upcoming changes, as well as when the PI receives notification from the VA Central IRB of  
1919 final approval of such changes. The PI will lead weekly meetings to discuss the study status with the  
1920 study leadership team (select co-Investigators, Research Coordinator, Data Analysts, Biostatistician,  
1921 and other study team members). Initial weekly meetings will be devoted to training local site  
1922 investigators and staff on informed consent procedures. The PI will also lead quarterly conference  
1923 calls to host status update/discussions with all co-Investigators, Local Site Investigators, and  
1924 all local site study team members.

1925  
1926  
1927 **8.0.B.ii. Shared drive** The Research Coordinator will maintain a shared drive on the Houston  
1928 VA HSR&D IQuEST secure server (that resides behind the VA firewall) that is accessible to local site  
1929 study team members (**see §7.0.B.**). The Research Coordinator will maintain the most current version of  
1930 all IRB approved documents on this shared drive.  
1931 When new or revised documents are submitted for approval, the Research Coordinator will notify the  
1932 Local Site Investigator and his/her study team that changes have been submitted for approval and are  
1933 under review by the VA Central IRB.

1934 Upon VA Central IRB approval of a new or revised form, the Research Coordinator will notify by  
1935 telephone and by email each Local Site Investigator and his/her study team that the new form has been  
1936 approved.

1937 All local site personnel will be asked to do the following:

- 1938 • File a printed copy of the VA Central IRB approval, and all newly approved
- 1939 documents, in the local site study binder.
- 1940 • Destroy all copies of previously approved versions of ICF, HIPAA, or other study forms.
- 1941 • Begin using the new form, or applying the newly approved procedure, immediately.

1942  
1943 The PI or the Research Coordinator will provide training on newly approved procedures to all local site  
1944 study team members.

1945  
1946  
1947  
1948 **8.0.C. Plan for informing local sites of any Serious Adverse Events (SAEs), Unanticipated**  
1949 **Problems, Protocol Deviations, or interim results that may impact conduct of the study**

1950 The Research Coordinator will notify all participating sites immediately of any SAEs, Unanticipated  
1951 problems, or interim results that have the potential to affect implementation of the study. A copy of the  
1952 SAE report or Protocol Deviation report that is submitted to the VA Central IRB will be sent to the Local  
1953 Site Investigator, as well as their local site study team members via encrypted email. Additional copies  
1954 will be sent to the local site R&D Committees.

- The PI will discuss SAEs, Unanticipated Problems, Protocol Deviations, and interim results that may affect the conduct of the study on the regular conference calls.

#### **8.0.D. Plan for ensuring the study is conducted according to the IRB-approved protocol.**

- The importance of conducting the study according to the IRB-approved protocol is emphasized by the PI to all study team members on a regular basis. In particular, all research team members are required to read the IRB-approved protocol (and any subsequent amendments), and research staff will receive specific training from the PI or Research Coordinator regarding protocol elements relevant to their study role before their involvement in the study begins. This study-specific training is over and above the mandatory trainings that all research staff receives.
- During weekly and monthly conference calls, the PI will follow-up with the LSIs to ensure that they continue to adhere to the protocol and to standard research compliance procedures as required by the VA.
- The PI will require the LSIs to hold weekly or bi-weekly meetings with their respective local site study teams

#### **8.0.E. Plan for notifying all local facility directors and LSIs when a multi-site study reaches the point that it no longer requires engagement of the local facility (e.g., all subsequent follow-up of subjects will be performed by the PI from another facility).**

- The PI will notify the LSIs when the study reaches the point at which it no longer requires engagement of the local facility.
- The LSIs will notify their respective local site Facility Directors and R&D Committees that their facilities will no longer be engaged in the research.

## **9.0 References**

1. VA DM-QUERI. Diabetes Mellitus Fact Sheet. The DM-QUERI Executive Committee, editor. 2011. VA QUERI. 10-28-0011.
2. Snow V, Weiss KB, Mottur-Pilson C, for the Clinical Efficacy Assessment Subcommittee of the American College of Physicians\*. The Evidence Base for Tight Blood Pressure Control in the Management of Type 2 Diabetes Mellitus. *Annals of Internal Medicine*. 2003;138:587-592.
3. Norris SL, Lau J, Smith SJ, Schmid CH, Engelgau MM. Self-management education for adults with type 2 diabetes: a meta-analysis of the effect on glycemic control. *Diabetes Care*. 2002;25:1159-1171.
4. Bodenheimer T, Wagner EH, Grumbach K. Improving primary care for patients with chronic illness: the chronic care model, Part 2. *JAMA*. 2002;288:1909-1914.
5. Funnell MM, Anderson RM. Working toward the next generation of diabetes self-management education. *Am J Prev Med*. 2002;22:3-5.
6. Naik AD, Palmer N, Petersen NJ, Street RJ, Suarez-Almazor M, Haidet P. Comparative effectiveness of goal setting in diabetes mellitus group clinics: randomized clinical trial. *Arch Intern Med*. 2011;171:453-459.
7. Locke EA, Latham GP. Building a practically useful theory of goal setting and task motivation. A 35-year odyssey. *Am Psychol*. 2002;57:705-717.
8. Strecher VJ, Seijts GH, Kok GJ, Glasgow RE. Goal Setting as a Strategy for Health Behavior Change. *Health Education & Behavior*. 1995;22:190-200.
9. Bodenheimer T, Handley MA. Goal-setting for behavior change in primary care: an exploration and status report. *Patient Educ Couns*. 2009;76:174-180.

- 2004 10.Naik AD, Teal CR, Rodriguez E, Haidet P. Knowing the ABCs: A comparative effectiveness study of  
2005 two methods of diabetes education. *Patient Educ Couns*. 2011; 85(3):383-9.
- 2006 11.Gonzales R, Handley MA. Improving Glycemic Control When "Usual" Diabetes Care Is Not Enough:  
2007 Comment on "The Effect of a Structured Behavioral Intervention on Poorly Controlled Diabetes"  
2008 [published online ahead of print October 10 2011]. *Arch Intern Med*. 2011. [http://archinte.ama-](http://archinte.ama-assn.org/cgi/content/full/archinternmed.2011.496v1)  
2009 [assn.org/cgi/content/full/archinternmed.2011.496v1](http://archinte.ama-assn.org/cgi/content/full/archinternmed.2011.496v1). Accessed November 9, 2011.
- 2010 12.Hibbard JH, Greene J, Tusler M. Improving the outcomes of disease management by tailoring care  
2011 to the patient's level of activation. *Am J Manag Care*. 2009;15:353-360.
- 2012 13.Sudore RL, Landefeld CS, Pqrez-Stable EJ, Bibbins-Domingo K, Williams BA, Schillinger D.  
2013 Unraveling the relationship between literacy, language proficiency, and patient-physician  
2014 communication. *Patient Education and Counseling*. 2009;75:398-402.
- 2015 14. Woodard LD, Landrum CR, Wang D, Petersen LA, Naik AD. Association between health literacy,  
2016 patient activation, and glycemic control among diabetic Veterans with multimorbidity. In press, *J*  
2017 *Gen Intern Med*.
- 2018 15.Skyler JS, Bergenstal R, Bonow RO. Intensive Glycemic Control and the Prevention of  
2019 Cardiovascular Events: Implications of the ACCORD, ADVANCE, and VA Diabetes Trials.  
2020 *Circulation*. 2009;119:351-357.
- 2021 16.Anderson RM, Funnell MM. Patient empowerment: reflections on the challenge of fostering the  
2022 adoption of a new paradigm. *Patient Educ Couns*. 2005;57:153-157.
- 2023 17.Funnell MM, Brown TL, Childs BP, et al. National Standards for Diabetes Self-Management  
2024 Education. *Diabetes Care*. 2009;32:S87-S94.
- 2025 18.Pogach LM, Brietzke SA, Cowan CL, Jr.. Development of evidence-based clinical practice  
2026 guidelines for diabetes: the Department of Veterans Affairs/Department of Defense guidelines  
2027 initiative. *Diabetes Care*. 2004;27 Suppl 2:B82-B89.
- 2028 19.Diabetes QUERI Center. 2008 QUERI Strategic Plan. Kerr EA, editor. 2008. Department of  
2029 Veterans Affairs Quality Enhancement Research Initiative (QUERI). 10-20-2011.
- 2030 20.Bodenheimer T, Lorig K, Holman H, Grumbach K. Patient Self-management of Chronic Disease in  
2031 Primary Care. *JAMA: The Journal of the American Medical Association*. 2002;288:2469-2475.
- 2032 21.Ostbye T, Yarnall KSH, Krause KM, Pollak KI, Gradison M, Michener JL. Is There Time for  
2033 Management of Patients With Chronic Diseases in Primary Care? *The Annals of Family Medicine*.  
2034 2005;3:209-214.
- 2035 22.VA Patient Centered Primary Care Implementation Work Group. Patient Centered Medical Home  
2036 Model Concept Paper. 2010. 10-13-0011.
- 2037 23.Piette J, Holtz B, Beard A, et al. Improving chronic illness care for veterans within the framework of  
2038 the Patient-Centered Medical Home: experiences from the Ann Arbor Patient-Aligned Care Team  
2039 Laboratory. *Translational Behavioral Medicine*. 2011;1-9.
- 2040 24.Locke EA, Latham GP. *A Theory of Goal Setting and Task Performance*. Englewood, NJ: Prentice  
2041 Hall, 1990.
- 2042 25.Schillinger D, Handley M, Wang F, Hammer H. Effects of self-management support on structure,  
2043 process, and outcomes among vulnerable patients with diabetes: a three-arm practical clinical trial.  
2044 *Diabetes Care*. 2009;32:559-566.
- 2045 26.DeWalt D, Broucksou K, Hawk V, et al. Comparison of a one-time educational intervention to a  
2046 teach-to-goal educational intervention for self-management of heart failure: design of a randomized  
2047 controlled trial. *BMC Health Services Research*. 2009;9:99.
- 2048 27.Schillinger D, Hammer H, Wang F, et al. Seeing in 3-D: Examining the Reach of Diabetes Self-  
2049 Management Support Strategies in a Public Health Care System. *Health Educ Behav*. 2007;35:664-  
2050 682.
- 2051 28.Weinger K, Beverly EA, Lee Y, Sitnokov L, Ganda OP, Caballero AE. The Effect of a Structured  
2052 Behavioral Intervention on Poorly Controlled Diabetes: A Randomized Controlled Trial [published  
2053 online ahead of print October 10 2011]. *Arch Intern Med*. 2011.  
2054 <http://www.ncbi.nlm.nih.gov/pubmed/21986346>. Accessed November 4, 2011.

- 2055 29.Frosch DL, Uy V, Ochoa S, Mangione CM. Evaluation of a Behavior Support Intervention for  
2056 Patients With Poorly Controlled Diabetes [published online ahead of print October 10 2011]. Arch  
2057 Intern Med. 2011; <http://archinte.ama-assn.org/cgi/content/full/archinternmed.2011.497v1>. Accessed  
2058 November 5, 2011.
- 2059 30.Naik AD, Schulman-Green D, McCorkle R, Bradley EH, Bogardus ST, Jr. Will older persons and  
2060 their clinicians use a shared decision-making instrument? J Gen Intern Med. 2005;20:640-643.
- 2061 31.Schulman-Green DJ, Naik AD, Bradley EH, McCorkle R, Bogardus ST. Goal setting as a shared  
2062 decision making strategy among clinicians and their older patients. Patient Educ Couns.  
2063 2006;63:145-151.
- 2064 32.Naik AD, Issac TT, Street RL, Jr., Kunik ME. Understanding the quality chasm for hypertension  
2065 control in diabetes: a structured review of "co-maneuvers" used in clinical trials. J Am Board Fam  
2066 Med. 2007;20:469-478.
- 2067 33.Naik AD, Kallen MA, Walder A, Street RL, Jr. Improving hypertension control in diabetes mellitus:  
2068 the effects of collaborative and proactive health communication. Circulation. 2008;117:1361-1368.
- 2069 34.Parchman ML, Zeber JE, Palmer RF. Participatory Decision Making, Patient Activation, Medication  
2070 Adherence, and Intermediate Clinical Outcomes in Type 2 Diabetes: A STARNet Study. The Annals  
2071 of Family Medicine. 2010;8:410-417.
- 2072 35.Lorig K. Action Planning: A Call To Action. The Journal of the American Board of Family Medicine.  
2073 2006;19:324-325.
- 2074 36.Remmers C, Hibbard J, Mosen DM, Wagenfield M, Hoyer RE, Jones C. Is Patient Activation  
2075 Associated With Future Health Outcomes and Healthcare Utilization Among Patients With Diabetes?  
2076 The Journal of Ambulatory Care Management. 2009;32.
- 2077 37.Schillinger D, Grumbach K, Piette J, et al. Association of Health Literacy With Diabetes Outcomes.  
2078 JAMA: The Journal of the American Medical Association. 2002;288:475-482.
- 2079 38.Fransen MP, von Wagner C, Essink-Bot ML. Diabetes self-management in patients with low health  
2080 literacy: Ordering findings from literature in a health literacy framework. Patient Educ Couns. 2011  
2081 Dec 23.
- 2082 39.Cavanaugh K, Wallston KA, Gerbretsadik T, et al. Addressing literacy and numeracy to improve  
2083 diabetes care: two randomized controlled trials. Diabetes Care. 2009 Dec;32(12):2149-55.
- 2084 40.Naik AD, Street RL, Jr., Castillo D, Abraham NS. Health literacy and decision making styles for  
2085 complex antithrombotic therapy among older multimorbid adults. Patient Educ Couns. 2011;85:499-  
2086 504.
- 2087 41.Lindau ST, Basu A, Leitsch SA. Health Literacy as a Predictor of Follow-Up After an Abnormal Pap  
2088 Smear: A Prospective Study. Journal of General Internal Medicine. 2006;21:829-834.
- 2089 42.Bass PF, III, Wilson JF, Griffith CH, Barnett DR. Residents' ability to identify patients with poor  
2090 literacy skills. Acad Med. 2002;77:1039-1041.
- 2091 43.Seligman HK, Wang FF, Palacios JL, et al. Physician Notification of Their Diabetes Patients' Limited  
2092 Health Literacy. J Gen Intern Med. 2005;20:1001-1007.
- 2093 44.Woodard LD, Petersen LA. Improving the performance of performance measurement. J Gen Intern  
2094 Med. 2010;25:100-101.
- 2095 45.Curran GM, Bauer M, Mittman B, Pyne JM, Stetler C. Effectiveness-implementation hybrid designs:  
2096 combining elements of clinical effectiveness and implementation research to enhance public health  
2097 Impact. Med Care 2012, 50: 217-226.
- 2098 46. Petersen LA, Woodard LD, Henderson LM, Urech TH, Pietz K. Will hypertension performance  
2099 measures used for pay-for-performance programs penalize those who care for medically complex  
2100 patients? Circulation. 2009;119:2978-2985.
- 2101 47.Woodard LD, Landrum CR, Urech TH, Profit J, Petersen LA. Treating chronically ill diabetic patients  
2102 with limited life expectancy: implications for performance measurement. J Am Geriatr Soc.  
2103 2011;60(2):193-201.
- 2104 48.Teal CR, Haidet P, Balasubramanyam AS, Rodriguez E, Naik AN. Measuring the Quality of  
2105 Patients' Goals and Action Plans: Development and Validation of a Novel Tool. BMC Medical  
2106 Informatics and Decision Making. 2012; Under review.

- 2107 49.Hibbard JH, Stockard J, Mahoney ER, and Tusler M. Development of the Patient Activation  
2108 Measure (PAM): Conceptualizing and Measuring Activation in Patient and Consumers. *Health*  
2109 *Services Research*. 2004; 39(4): 1005-1026.
- 2110 50.Chew LD, Bradley KA, Boyko EJ. Brief questions to identify patients with inadequate health literacy.  
2111 *Fam Med*. 2004;36:588-594.
- 2112 51.Kitson AL, Rycroft-Malone J, Harvey G, McCormack B, Seers K, Titchen A. Evaluating the  
2113 successful implementation of evidence into practice using the PARIHS framework: theoretical and  
2114 practical challenges. *Implement Sci*. 2008;3:1.
- 2115 52.Helfrich CD, Damschroder LJ, Hagedorn HJ, et al. A critical synthesis of literature on the promoting  
2116 action on research implementation in health services (PARIHS) framework. *Implement Sci*.  
2117 2010;5:82.
- 2118 53.Helfrich CD, Li YF, Sharp ND, Sales AE. Organizational readiness to change assessment (ORCA):  
2119 development of an instrument based on the Promoting Action on Research in Health Services  
2120 (PARIHS) framework. *Implement Sci*. 2009;4:38.
- 2121 54.Stetler CB, Damschroder LJ, Helfrich CD, Hagedorn HJ. A Guide for applying a revised version of  
2122 the PARIHS framework for implementation. *Implement Sci*. 2011;6:99.
- 2123 55.Miles MB, Huberman AM. *Qualitative Data Analysis: An expanded source book*. 2nd ed. Thousand  
2124 Oaks, CA: 1994.
- 2125 56.Silverman D. *Doing Qualitative Research: A Practical Handbook*. Thousand Oaks, CA: 2000.
- 2126 57.Strauss AL, Corbin JM. *Grounded Theory in Practice*. 2nd ed. Thousand Oaks, CA: 1998.
- 2127 58.Denzin NK, Lincoln YS. *The Sage handbook of Qualitative Research*. 3rd ed. Thousand Oaks: Sage  
2128 Publications, 2005.
- 2129 59.Spencer L, Ritchie J, O'Conner W. Analysis: practices, principles and processes. In: Ritchie J, Lewis  
2130 J, eds. *Qualitative Research Practice: A guide for social science students and researchers*.  
2131 Thousand Oaks: Sage Publications; 2003;199-218.
- 2132 60.Linstone HA, Turoff M. *The Delphi Method: Techniques and Applications*. [e-book]. Linstone HA,  
2133 Turoff M; 2002. Available from: Findlay.edu. Accessed June 4, 2011.
- 2134 61.Heisler M, Vijan S, Anderson RM, Ubel PA, Bernstein SJ, Hofer TP. When do patients and their  
2135 physicians agree on diabetes treatment goals and strategies, and what difference does it make? *J*  
2136 *Gen Intern Med*. 2003;18:893-902.
- 2137 62.Glasgow RE, Wagner EH, Schaefer J, Mahoney LD, Reid RJ, Greene SM. Development and  
2138 Validation of the Patient Assessment of Chronic Illness Care (PACIC). *Medical Care*. 2005; 43(5):  
2139 436-444.
- 2140 63.Johnson JA, Coons SJ, Ergo A, Szava-Kovats G. Valuation of EuroQOL (EQ-5D) health states in  
2141 an adult US sample. *Pharmacoeconomics*. 1998;13(4):421-33.
- 2142 64.Herdman M, Gudex C, Lloyd A, et al. Development and preliminary testing of the new five-level  
2143 version of EQ-5D (EQ-5D-5L). *Qual Life Res*. 2011; 20(10):1727-36.
- 2144 65.Fisher L, Polonsky W, Parkin CG, Jelsovsky Z, Amstutz L, Wagner RS. The impact of blood  
2145 glucose monitoring on depression and distress in insulin-naive patients with type 2 diabetes. *Current*  
2146 *Medical Research and Opinion*. 2011; 3:39-46.
- 2147 66.Shnurr PP, Freidman MJ, Engel CC, et al. Issues in the design of multisite clinical trials of  
2148 psychotherapy: VA Cooperative Study No. 494 as an example. *Contemporary Clinical Trials*. 2005;  
2149 26: 626-636.
- 2150 67.Raudenbush SW et al. (2011). *Optimal Design Software for Multilevel and Longitudinal Research*  
2151 (Version 3.01) [Software].
- 2152 68.Heisler M, Vijan S, Makki F, Piette JD. Diabetes control with reciprocal peer support versus nurse  
2153 care management: a randomized trial. *Ann Intern Med*. 2010;153:507-515.
- 2154 69.West DS, Dillillo V, Bursac Z, Gore SA, Greene PG. Motivational interviewing improves weight loss  
2155 in women with type 2 diabetes. *Diabetes Care*. 2007; 30:1081-1087.
- 2156 70.Fischer HH, Eisert SL, Everhart RM, et al. Nurse-run, telephone-based outreach to improve lipids in  
2157 people with diabetes. *Am J Manag Care*. 2012;18:77-84.

- 2158 71.Hawkins SY. Improving glycemic control in older adults using a videophone motivational diabetes  
2159 self-management intervention. *Research and Theory for Nursing Practice: An International Journal*.  
2160 2010;24:217-232.
- 2161 72.Prochaska JO, DiClemente CC. Stages and processes of self-change of smoking: Toward an  
2162 integrative model of change. *Journal of Consulting and Clinical Psychology*. 1983; 51: 390–395.
- 2163 73.Prochaska, JO, DiClemente CC. *The transtheoretical approach: Crossing the traditional boundaries*  
2164 *of change*. Homewood, IL: Irwin; 1984.
- 2165 74.Chen EH, Thom DH, Hessler DM, et al. Using a teamlet model to improve chronic care in an  
2166 academic primary care practice. *J Gen Intern Med*. 2010; 25:610-614.
- 2167 75.Sharons A, Abramowitz MD, Flattery D, Franses K, Berry L. Linking a motivational interviewing  
2168 curriculum to the chronic care model. *J Gen Intern Med*. 2010; 25: 620-626.
- 2169 76.Bodenheimer T, Davis C, Holman H. Helping patients adopt healthier behaviors. *Clinical Diabetes*.  
2170 2007; 25:66-70.
- 2171 77.DeWalt DA, Callahan LF, Hawk VH, et al. Health Literacy Universal Precautions Toolkit. (Prepared  
2172 by North Carolina Network Consortium, The Cecil G. Sheps Center for Health Services Research,  
2173 The University of North Carolina at Chapel Hill, under Contract No. HHS290200710014.) AHRQ  
2174 Publication No. 10-0046-EF) Rockville, MD. Agency for Healthcare Research and Quality. April  
2175 2010.
- 2176 78.National Patient Safety Association (NPSA) Web site. Available at [http://www.npsf.org/for-](http://www.npsf.org/for-healthcare-professionals/programs/ask-me-3/)  
2177 [healthcare-professionals/programs/ask-me-3/](http://www.npsf.org/for-healthcare-professionals/programs/ask-me-3/). Accessed May 30, 2012
- 2178 79.Cully JA, Mignogna J, Stanley MA, et al. Development and pilot testing of a standardized training  
2179 program for a patient-mentoring intervention to increase adherence to outpatient HIV care. *AIDS*  
2180 *Patient Care STDS*. 2012;26(3):165-72.
- 2181 80.Cully JA, Teten AL, Benge JF, Sorocco KH, Kauth MR. Multidisciplinary cognitive-behavioral  
2182 therapy training for the veterans affairs primary care setting. *Prim Care Companion J Clin*  
2183 *Psychiatry*. 2010;12(3).
- 2184 81.Larsen DL, Attkisson CC, Hargreaves WA, Nguyen TD. Assessment of client/patient satisfaction:  
2185 Development of a general scale. *Evaluation and Program Planning*. 1979; 2, 197-207.
- 2186 82. Attkisson CC, Zwick RJ.The Client Satisfaction Questionnaire: Psychometric properties and  
2187 correlations with service utilization and psychotherapy outcome. *Evaluation and Program Planning*.  
2188 1982; 5(3), 233-237.
- 2189 83.Callahan CM, Unverzagt FW, Hui SL, Perkins AJ, Hendrie HC. Six-item screener to identify  
2190 cognitive impairment among potential subjects for clinical research. *Med Care*. 2002;40:771-781.
- 2191 84.Sheehan DV, Lecrubier Y, Sheehan KH, et al. The Mini-International Neuropsychiatric Interview  
2192 (M.I.N.I.): the development and validation of a structured diagnostic psychiatric interview for DSM-IV  
2193 and ICD-10. *J Clin Psychiatry*. 1998;59 Suppl 20:22-33.
- 2194 85.Rohde P, Lewinsohn PM, Seeley JR. Comparability of telephone and face-to-face interviews in  
2195 assessing axis I and II disorders. *Am J Psychiatry*. 1997;154:1593-1598.
- 2196 86.Flegel K. Controlling the complications of diabetes: It's about the sugar. *Canadian Medical*  
2197 *Association Journal*. 2009;181:357.
- 2198 87.Polonsky WH, Fisher L, Earles J, et al. Assessing psychosocial distress in diabetes: development  
2199 of the diabetes distress scale. *Diabetes Care*. 2005;28:626-631.
- 2200 88.Fisher L, Skaff MM, Mullan JT, et al. Clinical depression versus distress among patients with type 2  
2201 diabetes: not just a question of semantics. *Diabetes Care*. 2007;30:542-548.
- 2202 89.Lorig KR, Ritter P, Stewart AL, et al. Chronic disease self-management program: 2-year health  
2203 status and health care utilization outcomes. *Med Care*. 2001;39:1217-1223.
- 2204 90.Chew LD, Griffin JM, Partin MR, et al. Validation of screening questions for limited health literacy in  
2205 a large VA outpatient population. *J Gen Intern Med*. 2008;23:561-566.
- 2206 91.Rothman RL, Malone R, Bryant B. et al. The spoken knowledge in low literacy in diabetes scale: a  
2207 diabetes knowledge scale for vulnerable patients.*The Diabetes EDUCATOR*. 2005;31(2):215-224.
- 2208 92.Jeppesen KM, Coyle JD, Miser WF. Screening Questions to Predict Limited Health Literacy: A  
2209 Cross-Sectional Study of Patients With Diabetes Mellitus. *Ann Fam Med*. 2009; 7(1): 24-31.

- 2210 93. Morisky DE, Ang A., Krousel-Wood M, Ward H. Predictive Validity of Medication Adherence  
2211 Measure for Hypertension Control. *Journal of Clinical Hypertension*.2008; 10: 348-354.  
2212 94. Kroenke K, Strine TW, Spritzer RL, Williams JB, Berry JT, Mokdad AH. The PHQ-8 as a measure  
2213 of current depression in the general population. *J Affect Disord*. 2009; 114(1-3):163-73.  
2214 95. Razykov I, Ziegelstein RC, Whooley MA, Thombs BD. The PHQ-9 versus the PHQ-8--is item 9  
2215 useful for assessing suicide risk in coronary artery disease patients? Data from the Heart and Soul  
2216 Study. *J Psychosom Res*. 2012; 73(3):163-168.  
2217 96. Lorig K, Stewart A, Ritter P, González V, Laurent D, & Lynch J, Outcome Measures for Health  
2218 Education and other Health Care Interventions. Thousand Oaks CA: Sage Publications, 1996;25:37-38.
- 2219 97.Toobert DJ, Hampson SE, Glasgow RE. The summary of diabetes self-care activities measure:  
2220 results from 7 studies and a revised scale. *Diabetes Care*. 2000;23:943-950.  
2221 98.Bendel RB, Afifi AA. Comparisons of stopping rules in forward regression. *J Am Stat Assoc*.  
2222 1977;72:46-53.  
2223 99.Rubin DB. Inference and missing data. *Biometrika*. 1976;63:581-590.  
2224 100.ShROUT PE, Bolger N. Mediation in experimental and nonexperimental studies: New procedures  
2225 and recommendations. *Psychological Methods*. 2002; 7(4): 422-445.  
2226 101.Muthén LK, Muthén BO. *Mplus User's Guide*. Sixth Edition. 1998-2010. Los Angeles, CA: Muthén  
2227 & Muthén.  
2228  
2229  
2230  
2231  
2232  
2233  
2234  
2235  
2236



| Version                                                     | Date       | File name                                                              | Notes                                                                                                                                                                                                                                                                                                                                               |
|-------------------------------------------------------------|------------|------------------------------------------------------------------------|-----------------------------------------------------------------------------------------------------------------------------------------------------------------------------------------------------------------------------------------------------------------------------------------------------------------------------------------------------|
| Initial Protocol                                            | 11/7/2014  |                                                                        |                                                                                                                                                                                                                                                                                                                                                     |
| Initial Approval Letter                                     | 3/3/2015   | Final PI Approval 14-24                                                |                                                                                                                                                                                                                                                                                                                                                     |
| Initial Patient ICF                                         | 3/3/2015   | Oct162014_ICF-VA-1086 Update Patients_2015Feb20                        |                                                                                                                                                                                                                                                                                                                                                     |
| Initial Provider ICF                                        | 3/3/2015   | Nov62014_ICF-VA-1086 Update Providers_2015Feb2                         |                                                                                                                                                                                                                                                                                                                                                     |
| Amendment 1-Form 116                                        | 4/21/2015  | 116 Request to Amend or Modify 080213_CIRB 14-24_LW                    | revised the EUC protocol; revised signer on the EUC recruitment letter to be LSI                                                                                                                                                                                                                                                                    |
| Amendment 2- Form 116                                       | 4/30/2015  | 116 2015April29 Amend CIRB 14-24_ Amendment 2                          | Blinded staff for data collection; new FHL/PAM matrix; added satisfaction survey for patient perceptions of satisfaction with providers; added ability to recruit more provider participants after Phase 1; amended procedure to create the recruitment cohort; amended the survey about prior exposure to diabetes education; amended EUC protocol |
| Amendments 1 and 2 Approval Letter                          | 6/3/2015   | PISC Amendments 1 and 2 Letter 14-24                                   | approved together given the short time between submissions                                                                                                                                                                                                                                                                                          |
| Amendment 1 and 2 Protocol                                  | 4/16/2015  | 2015April20_Amendment1_EPICprotocol_clean                              |                                                                                                                                                                                                                                                                                                                                                     |
| Amendment 1 and 2 Patient ICF                               | 6/3/2015   | 2015April21_ICF-VA-1086 Update Patients_                               |                                                                                                                                                                                                                                                                                                                                                     |
| Amendment 3- Form 116                                       | 2/12/2016  | FinalSignedForm116_2016Feb17_116 Request to Amend or Modify_CIRB 14-24 | added Houston as an enrollment site; added the PAM as a measure to be collected at both follow up timepoints; amended the follow up data collection timepoints to allow for the implementation time between screening/baseline and the start of the intervention; amended the patient payment procedures                                            |
| Amendment 3 Approval Letter                                 | 3/1/2016   | 14-24 PI Amendment 3 Approval Letter                                   |                                                                                                                                                                                                                                                                                                                                                     |
| Amendment 3 Protocol                                        | 2/17/2016  | Final_2016Feb17_Amendment3_EPICprotocol_Clean                          |                                                                                                                                                                                                                                                                                                                                                     |
| Amendment 3 Patient ICF                                     | 2/29/2016  | Final_2016Feb17_ICF-VA-1086 Update Patients_Amend3_                    |                                                                                                                                                                                                                                                                                                                                                     |
| Amendment 4- Form 116                                       | 3/8/2016   | 2016Mar8_Form116                                                       | revised the Providers ICF to reflect Houston as an enrollment site                                                                                                                                                                                                                                                                                  |
| Amendment 4 Approval Letter                                 | 3/15/2016  | 14-24 PI Amendment 4 Letter                                            |                                                                                                                                                                                                                                                                                                                                                     |
| Amendment 4 Protocol                                        | N/A        | only an update to the ICF form                                         |                                                                                                                                                                                                                                                                                                                                                     |
| Amendment 4 Providers ICF                                   | 3/15/2016  | 2016Mar8_ICF-VA-1086 Update Providers_                                 |                                                                                                                                                                                                                                                                                                                                                     |
| Amendment 4 Providers ICF (updated page numbers in headers) | 3/15/2016  | 2016Mar17_ICF-VA-1086_Providers(update)_032216                         |                                                                                                                                                                                                                                                                                                                                                     |
| Amendment 5- Form 116                                       | 5/5/2016   | 2016May6_Form116                                                       | revised the Hines and Jesse Brown LSI ICF for providers to reflect the correct name of the LSI and not the PISC                                                                                                                                                                                                                                     |
| Amendment 5 Approval Letter                                 | 5/22/2016  | 14-24 PI Amendment 5 Approval Letter dated 5.20.16                     |                                                                                                                                                                                                                                                                                                                                                     |
| Amendment 5 Protocol                                        | N/A        | only an update to the local site ICF forms                             |                                                                                                                                                                                                                                                                                                                                                     |
| Amendment 5 ICF                                             | N/A        | no update to PISC model ICF                                            |                                                                                                                                                                                                                                                                                                                                                     |
| Amendment 6- Form 116                                       | 11/7/2016  | Form116_Signed_Amendment6                                              | increased enrollment target to include screen failures who were enrolled, but did not participate; increased target for enrolled providers to meet interest of local staff                                                                                                                                                                          |
| Amendment 6 Approval Letter                                 | 11/22/2016 | Form116_Signed_Amendment6                                              |                                                                                                                                                                                                                                                                                                                                                     |
| Amendment 6 Protocol                                        | 2/17/2016  | 02_ Study Protocol v.3_021716                                          |                                                                                                                                                                                                                                                                                                                                                     |

2237

|                                           |            |                                                            |                          |
|-------------------------------------------|------------|------------------------------------------------------------|--------------------------|
| Amendment 6 ICF                           | N/A        | did not require an update to the ICF                       |                          |
| 2015 PISC Renewal- Form 115b              | 11/2/2015  | WoodardL_115bPISCApplicationForContinuingReview_01Sept2015 |                          |
| 2015 PISC Renewal Approval Letter         | 12/28/2015 | 2015Dec28_CR PISC Approval Expedited                       | renewed until 1/8/2017   |
| 2016 PISC Renewal- Form 115b              | 11/7/2016  | Woodard.Form115b.2016Nov7                                  |                          |
| Houston LSI Renewal 2016- Form 115a       | 11/7/2016  | Woodard.Form115a.2016Nov7                                  |                          |
| 2016 PISC Renewal Approval Letter         | 12/27/2016 | 2016Dec27_Continuing Review PI Approval                    | renewed until 1/8/2018   |
| 2017 PISC Renewal- Form 115a              | 11/2/2017  | Woodard.115a.2017Nov2                                      |                          |
| Houston LSI Renewal 2017- Form 115b       | 11/3/2017  | Woodard.115b.2017Nov3                                      |                          |
| PISC Renewal Approval Letter 2017         | 12/12/2017 | 2017Dec13_Continuing Review PI Approval                    | renewed until 1/8/2019   |
| 2018 PISC Renewal- Form 115a              | 11/7/2018  | 14-24_115a_2018Nov7 (003)_LW                               |                          |
| Houston LSI Renewal 2018- Form 115b       | 11/7/2018  | 14-24_115b_Houston_Nov7 (003)_LW                           |                          |
| PISC Renewal Approval Letter 2018         | 12/18/2018 | CR PISC Approval Expedited                                 | renewed until 1/8/2020   |
| Initial Houston LSI Application- Form 104 | 3/14/2016  | 104 Woodard_LSI_104_3.14                                   |                          |
| Initial Houston LSI Approval Letter       | 4/7/2016   | Initial Review Houston LSI Approval Letter 14-24           |                          |
| Initial Houston LSI Patient ICF           | 4/7/2016   | 2016Feb17_ICF-VA-1086_Patients_Houston                     |                          |
| Initial Houston LSI Provider ICF          | 4/7/2016   | 2016Mar17_ICF-VA-1086_Providers_Houston                    |                          |
| 2017 LSI Houston Renewal- Form 115b       | 11/3/2017  | Woodard.115b.2017Nov3                                      |                          |
| 2017 LSI Houston Approval Letter          | 12/12/2017 | CR LSI Approval Houston                                    | renewed until 1/8/2019   |
| 2018 LSI Houston Renewal- Form 115b       | 11/7/2018  | 14-24_115b_Houston_Nov7 (003)_LW                           |                          |
| 2018 LSI Houston Approval Letter          | 12/18/2018 | CR LSI Approval Houston                                    | renewawed until 1/8/2020 |
