# Supplementary material for: Ascertainment of Minimal Clinically Important Differences in the Diabetes Distress Scale–17: A Secondary Analysis of a Randomized Clinical Trial
Source: PubMed Central journal article supplement (PMC10652154; doi:10.1001/jamanetworkopen.2023.42950), 2023-11-15
Supplement: jamanetwopen-e2342950-s003.pdf [file jamanetwopen-e2342950-s003.pdf]

## Data Sharing Statement

Banks. Ascertainment of Minimal Clinically Important Differences in the Diabetes Distress Scale—17. *JAMA Netw Open*. Published November 15, 2023.  
doi:10.1001/jamanetworkopen.2023.42950

### Data

**Data available:** No
